# Supplementary material
Source: PubMed Central journal article supplement (PMC4760217)
Supplement: MCB.01009-15_zmb999101149so1.pdf [file MCB.01009-15_zmb999101149so1.pdf]

# Supplemental data

## Structure of GPN-loop GTPase Npa3 and implications for RNA polymerase II assembly

Jürgen Niesser<sup>a,b</sup>, Felix R. Wagner<sup>b</sup>, Dirk Kostrewa<sup>b</sup>, Wolfgang Mühlbacher<sup>a</sup> and Patrick Cramer<sup>a</sup>

<sup>a</sup>Max-Planck-Institute for Biophysical Chemistry, Department of Molecular Biology, Göttingen, Germany.

<sup>b</sup>Gene Center and Department of Biochemistry, Ludwig-Maximilians-Universität München, Munich, Germany.

Running Head: Structure of GPN-loop GTPase and Pol II assembly

Address correspondence to Patrick Cramer, [pcramer@mpibpc.mpg.de](mailto:pcramer@mpibpc.mpg.de)

## Supplemental Figures

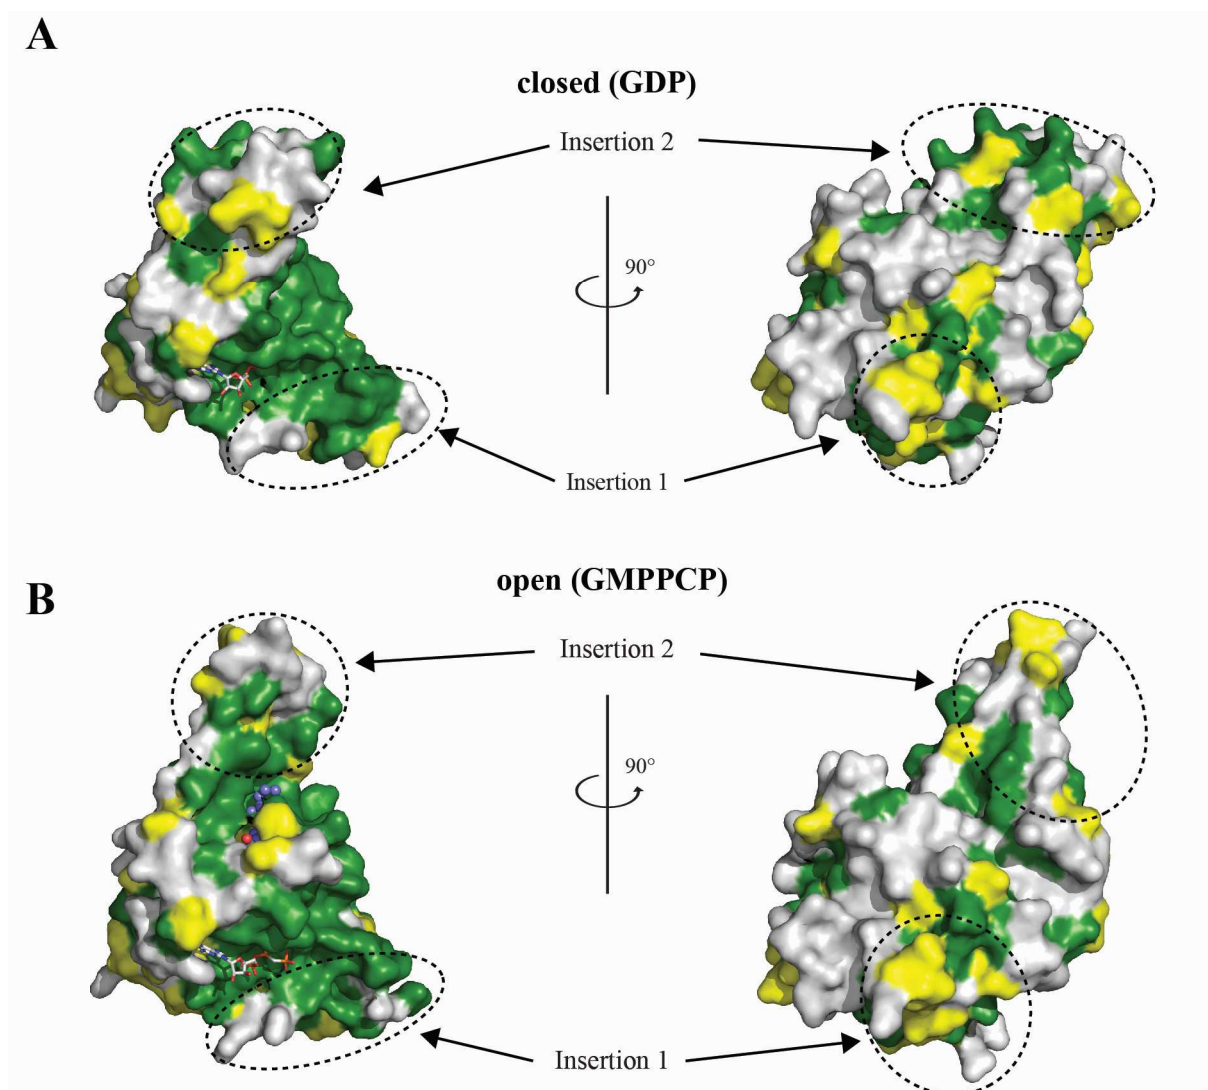

**Supplemental Figure S1** Surface conservation of Npa3

**A** in the closed, GDP-bound and

**B** open, GMPPCP-bound state. The bound lipid is shown as space blue spheres.

Invariant residues are shown in green, conserved residues in yellow and variable residues in grey.

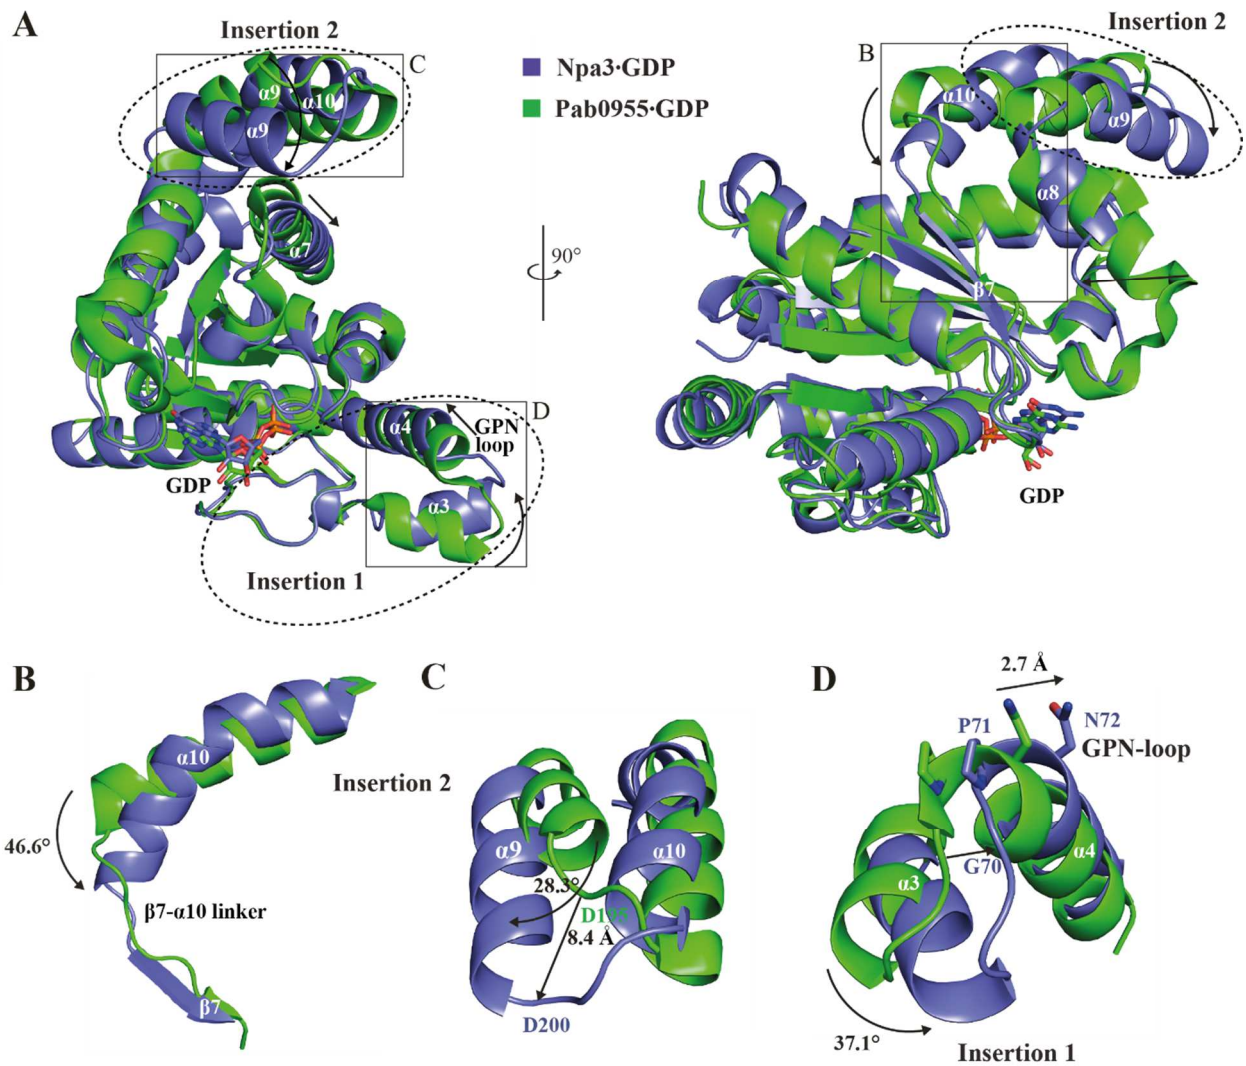

**Supplemental Figure S2** Superposition of Npa3-GDP (blue) and the archaeal GPN-loop GTPase Pab0955-GDP (green) reveals eukaryote-specific structural features.

- A** Superposition of overall structures from Npa3-GDP and Pab0955-GDP (pdb code: 1YRB,(18)) shown as front view (left) and side view (right). Significant differences between the two structures are indicated with black arrows and the insertion regions are shown with dashed lines. Boxes highlight areas shown in B-D.
- B** The linker between strand  $\beta 7$  and helix  $\alpha 10$  is shorter in Npa3 leading to a strong bending of helix  $\alpha 10$ .
- C** Helix  $\alpha 9$  of Npa3 is rotated, leading to significant differences of insertion 2 compared to the archaeal GPN-loop GTPase.
- D** Helix  $\alpha 3$  of insertion 1 is rotated and the GPN-loop is shifted.

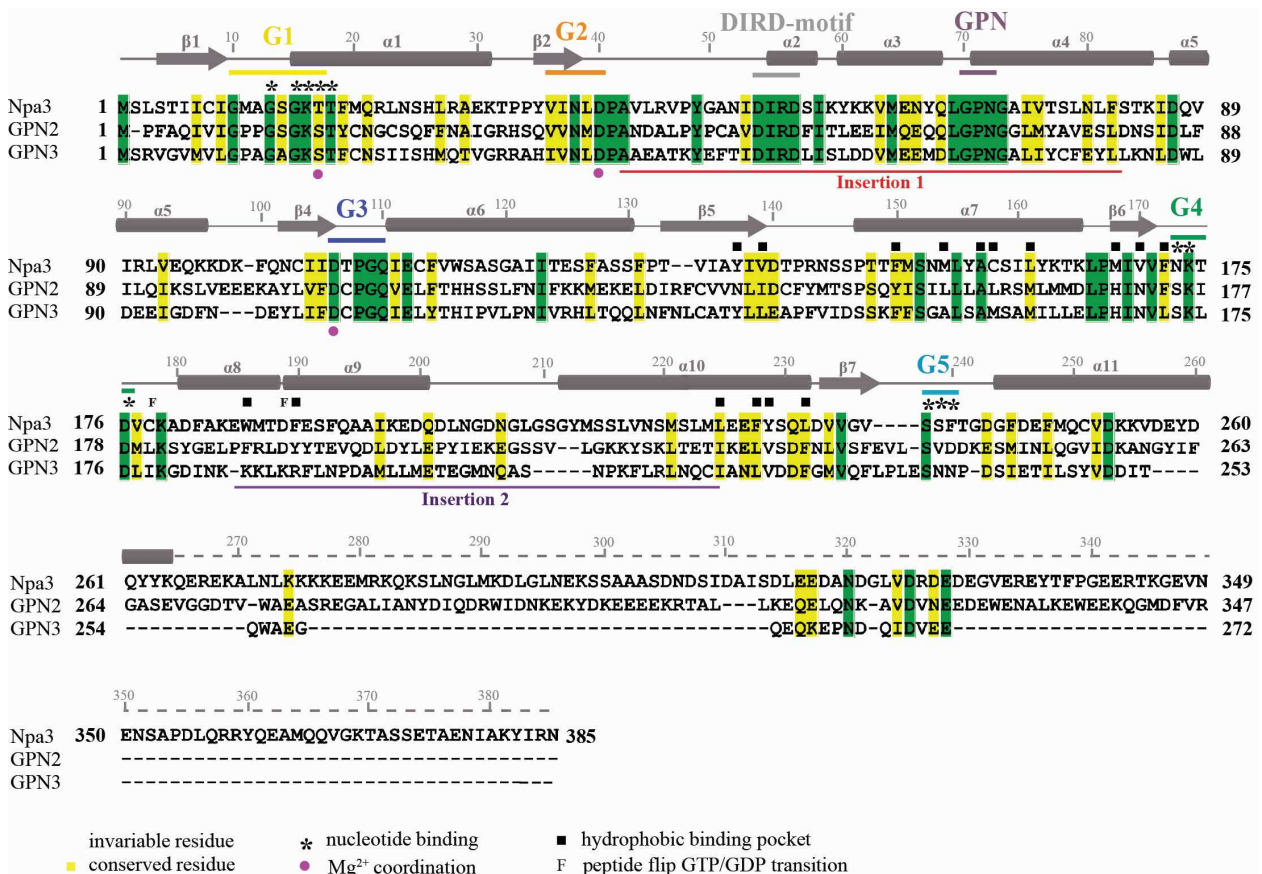

**Supplemental Figure S3** Amino acid sequence alignment of GPN-loop GTPases Npa3 from *S. cerevisiae* (*S.c.*), and its paralogs GPN2 and GPN3.

Secondary structure elements are indicated above the sequence (cylinders,  $\alpha$ -helices; arrows,  $\beta$ -strands; dashed line, no structural data available). Numbering above the sequence corresponds to Npa3. Invariant residues are in green whereas conserved residues are in yellow. The G-domains G1-G5 and insertion regions are marked with bars, residues of the hydrophobic pocket with black squares, residues involved in nucleotide-binding with asterisks and residues involved in magnesium binding with pink spheres.

**Supplemental Table S1** List of all 15meric (overlap: 11 amino acids; offset: 4 amino acids) Pol II-derived peptides, analyzed for Npa3 binding. ‘Start a.a.’ and ‘end a.a.’ depicts the first and last amino acid of the corresponding peptide in the respective Pol II subunit sequence. Peptides containing amino acids from two different subunits are shown in grey and were not further analyzed since they represent artificial sequences.

| Pol II subunit | Peptide No. | Start a.a. | End a.a. | Sequence         | Pol II subunit | Peptide No. | Start a.a. | End a.a. | Sequence          |
|----------------|-------------|------------|----------|------------------|----------------|-------------|------------|----------|-------------------|
| Rpb1           | 1           | 1          | 15       | MVGQQYSSAPLRTVK  | Rpb1           | 42          | 165        | 179      | GGCGNTQPTIRKDGL   |
|                | 2           | 5          | 19       | QYSSAPLRTVKEVQF  |                | 43          | 169        | 183      | NTQPTIRKDGLKLVG   |
|                | 3           | 9          | 23       | APLRTVKEVQFGLFS  |                | 44          | 173        | 187      | TIRKDGLKLVGSWKK   |
|                | 4           | 13         | 27       | TVKEVQFGLFSPEEV  |                | 45          | 177        | 191      | DGLKLVGSWKKDRAT   |
|                | 5           | 17         | 31       | VQFGLFSPEEVRAIS  |                | 46          | 181        | 195      | LVGSWKKDRATGDAD   |
|                | 6           | 21         | 35       | LFSPEEVRAISVAKI  |                | 47          | 185        | 199      | WKKDRATGDADPEPEL  |
|                | 7           | 25         | 39       | EEVRAISVAKIRFPE  |                | 48          | 189        | 203      | RATGDADPEPELRVLS  |
|                | 8           | 29         | 43       | AISVAKIRFPETMDE  |                | 49          | 193        | 207      | DADEPEPELRVLSTEEI |
|                | 9           | 33         | 47       | AKIRFPETMDETQTR  |                | 50          | 197        | 211      | PELRVLSTEEILNIF   |
|                | 10          | 37         | 51       | FPETMDETQTRAKIG  |                | 51          | 201        | 215      | VLSTEEILNIFKHIS   |
|                | 11          | 41         | 55       | MDETQTRAKIGGLND  |                | 52          | 205        | 219      | EEILNIFKHISVKDF   |
|                | 12          | 45         | 59       | QTRAKIGGLNDPRLG  |                | 53          | 209        | 223      | NIFKHISVKDFTSLG   |
|                | 13          | 49         | 63       | KIGGLNDPRLGSIDR  |                | 54          | 213        | 227      | HISVKDFTSLGFNEV   |
|                | 14          | 53         | 67       | LNDPRLGSIDRNLC   |                | 55          | 217        | 231      | KDFTSLGFNEVFSRP   |
|                | 15          | 57         | 71       | RLGSIDRNLCQCTCQ  |                | 56          | 221        | 235      | SLGFNEVFSRPEWMI   |
|                | 16          | 61         | 75       | IDRNLCQCTCQEGMN  |                | 57          | 225        | 239      | NEVFSRPEWMILTCL   |
|                | 17          | 65         | 79       | LKCQCTCQEGMNECPG |                | 58          | 229        | 243      | SRPEWMILTCLPVPP   |
|                | 18          | 69         | 83       | TCQEGMNECPGHFGH  |                | 59          | 233        | 247      | WMILTCLPVPPPPVVR  |
|                | 19          | 73         | 87       | GMNECPGHFGHIDLA  |                | 60          | 237        | 251      | TCLPVPPPPVVRPSIS  |
|                | 20          | 77         | 91       | CPGHFGHIDLAKPVF  |                | 61          | 241        | 255      | VPPPPVVRPSISFNES  |
|                | 21          | 81         | 95       | FGHIDLAKPVFHVGF  |                | 62          | 245        | 259      | PVRPSISFNESQRGE   |
|                | 22          | 85         | 99       | DLAKPVFHVGFIAKI  |                | 63          | 249        | 263      | SISFNESQRGEDDLT   |
|                | 23          | 89         | 103      | PVFHVGFIAKIKKVC  |                | 64          | 253        | 267      | NESQRGEDDLTFKLA   |
|                | 24          | 93         | 107      | VGFIKIKKVCCEVC   |                | 65          | 257        | 271      | RGEDDLTFKLADILK   |
|                | 25          | 97         | 111      | AKIKKVCCEVCMHCG  |                | 66          | 261        | 275      | DLTFKLADILKANIS   |
|                | 26          | 101        | 115      | KVCEVCMHCGKLLL   |                | 67          | 265        | 279      | KLADILKANISLETL   |
|                | 27          | 105        | 119      | CVCMHCGKLLLDEHN  |                | 68          | 269        | 283      | ILKANISLETLEHNG   |
|                | 28          | 109        | 123      | HCGKLLLDEHNELMR  |                | 69          | 273        | 287      | NISLETLEHNGAPHH   |
|                | 29          | 113        | 127      | LLLDEHNELMRQALA  |                | 70          | 277        | 291      | ETLEHNGAPPHAIEE   |
|                | 30          | 117        | 131      | EHNELMRQALAIKDS  |                | 71          | 281        | 295      | HNGAPPHAIEEAESL   |
|                | 31          | 121        | 135      | LMRQALAIKDSKKRF  |                | 72          | 285        | 299      | PHHAIEEAESLLQFH   |
|                | 32          | 125        | 139      | ALAIKDSKKRFAAIW  |                | 73          | 289        | 303      | IEEAESLLQFHVATY   |
|                | 33          | 129        | 143      | KDSKKRFAAIWTLCK  |                | 74          | 293        | 307      | ESLLQFHVATYMDND   |
|                | 34          | 133        | 147      | KRFAAIWTLCKTKMV  |                | 75          | 297        | 311      | QFHVATYMDNDIAGQ   |
|                | 35          | 137        | 151      | AIWTLCKTKMVCETD  |                | 76          | 301        | 315      | ATYMDNDIAGQPQAL   |
|                | 36          | 141        | 155      | LCKTKMVCETDVPSE  |                | 77          | 305        | 319      | DNDIAGQPQALQKSG   |
|                | 37          | 145        | 159      | KMVCETDVPSEDDPT  |                | 78          | 309        | 323      | AGQPQALQKSGRPVK   |
|                | 38          | 149        | 163      | ETDVPSEDDPTQLVS  |                | 79          | 313        | 327      | QALQKSGRPVKSIRA   |
|                | 39          | 153        | 167      | PSEDDPTQLVSRGGC  |                | 80          | 317        | 331      | KSGRPVKSIRARLKG   |
|                | 40          | 157        | 171      | DPTQLVSRGGCGNTQ  |                | 81          | 321        | 335      | PVKIRARLKGKEGR    |
|                | 41          | 161        | 175      | LVSRRGGCGNTQPTIR |                | 82          | 325        | 339      | IRARLKGKEGRIRGN   |

| Pol II subunit | Peptide No. | Start a.a. | End a.a.         | Sequence        | Pol II subunit | Peptide No. | Start a.a.      | End a.a. | Sequence        |
|----------------|-------------|------------|------------------|-----------------|----------------|-------------|-----------------|----------|-----------------|
| Rpb1           | 83          | 329        | 343              | LKGKEGRIRGNLMGK | Rpb1           | 129         | 513             | 527      | SPQSNKPCMGI     |
|                | 84          | 333        | 347              | EGRIRGNLMGKRVDF |                | 130         | 517             | 531      | NKPCMGIQDTLCGI  |
|                | 85          | 337        | 351              | RGNLMGKRVDFSART |                | 131         | 521             | 535      | MGIVQDTLCGIRKLT |
|                | 86          | 341        | 355              | MGKRVDFSARTVISG |                | 132         | 525             | 539      | QDTLCGIRKLTLRDT |
|                | 87          | 345        | 359              | VDFSARTVISGDPNL |                | 133         | 529             | 543      | CGIRKLTLRDTFIEL |
|                | 88          | 349        | 363              | ARTVISGDPNLELDQ |                | 134         | 533             | 547      | KLTLRDTFIELDQVL |
|                | 89          | 353        | 367              | ISGDPNLELDQVGV  |                | 135         | 537             | 551      | RDTFIELDQVLNMLY |
|                | 90          | 357        | 371              | PNLELDQVGVPKSIA |                | 136         | 541             | 555      | IELDQVLNMLYWVPD |
|                | 91          | 361        | 375              | LDQVGVPKSIAKTLT |                | 137         | 545             | 559      | QVLNMLYWVPDWDG  |
|                | 92          | 365        | 379              | GVPKSIAKTLTYPEV |                | 138         | 549             | 563      | MLYWVPDWDGVIPTP |
|                | 93          | 369        | 383              | SIKTLTYPEVVTPY  |                | 139         | 553             | 567      | VPDWDGVIPTPAIK  |
|                | 94          | 373        | 387              | TLTYPEVVTPYNIDR |                | 140         | 557             | 571      | DGVIPTPAIKPKPL  |
|                | 95          | 377        | 391              | PEVVTPYNIDRLTQL |                | 141         | 561             | 575      | PTPAIKPKPLWSGK  |
|                | 96          | 381        | 395              | TPYNIDRLTQLVRNG |                | 142         | 565             | 579      | IIPKPLWSGKQILS  |
|                | 97          | 385        | 399              | IDRLTQLVRNGPNEH |                | 143         | 569             | 583      | KPLWSGKQILSVAIP |
|                | 98          | 389        | 403              | TQLVRNGPNEHPGAK |                | 144         | 573             | 587      | SGKQILSVAIPNGIH |
|                | 99          | 393        | 407              | RNGPNEHPGAKYVIR |                | 145         | 577             | 591      | ILSVAIPNGIHLQRF |
|                | 100         | 397        | 411              | NEHPGAKYVIRDSGD |                | 146         | 581             | 595      | AIPNGIHLQRFDEGT |
|                | 101         | 401        | 415              | GAKYVIRDSGDRIDL |                | 147         | 585             | 599      | GIHLQRFDEGTTLLS |
|                | 102         | 405        | 419              | VIRDSGDRIDLRYSK |                | 148         | 589             | 603      | QRFDEGTTLLSPKDN |
|                | 103         | 409        | 423              | SGDRIDLRYSKRAGD |                | 149         | 593             | 607      | EGTTLLSPKDNGLMI |
|                | 104         | 413        | 427              | IDLRYSKRAGDIQLQ |                | 150         | 597             | 611      | LLSPKDNGLMIIDGQ |
|                | 105         | 417        | 431              | YSKRAGDIQLQYGWK |                | 151         | 601             | 615      | KDNGLMIIDGQIIFG |
|                | 106         | 421        | 435              | AGDIQLQYGWKVERH |                | 152         | 605             | 619      | MLIIDGQIIFGVVEK |
|                | 107         | 425        | 439              | QLQYGWKVERHIMDN |                | 153         | 609             | 623      | DGQIIFGVVEKKTVG |
|                | 108         | 429        | 443              | GWKVERHIMDNDPVL |                | 154         | 613             | 627      | IFGVVEKKTVGSSNG |
|                | 109         | 433        | 447              | ERHIMDNDPVLFNQR |                | 155         | 617             | 631      | VEKKTVGSSNGGLIH |
|                | 110         | 437        | 451              | MDNDPVLFNQRPSLH |                | 156         | 621             | 635      | TVGSSNGGLIHVVTR |
| 111            | 441         | 455        | PVLFNQRPSLHKMSM  | 157             | 625            | 639         | SNGGLIHVVTRKGP  |          |                 |
| 112            | 445         | 459        | NRQPSLHKMSMMAHR  | 158             | 629            | 643         | LIHVVTREKGPQVCA |          |                 |
| 113            | 449         | 463        | SLHKMSMMAHRVKVI  | 159             | 633            | 647         | VTREKGPQVCAKLF  |          |                 |
| 114            | 453         | 467        | MSMMAHRVKVIPYST  | 160             | 637            | 651         | KGPQVCAKLFQNIQK |          |                 |
| 115            | 457         | 471        | AHRVKVIPYSTFRLN  | 161             | 641            | 655         | VCAKLFQNIQKVNF  |          |                 |
| 116            | 461         | 475        | KVIPYSTFRLNLSVT  | 162             | 645            | 659         | LFQNIQKVNFVLLH  |          |                 |
| 117            | 465         | 479        | YSTFRLNLSVTSYPN  | 163             | 649            | 663         | IQKVNFVLLHNGFS  |          |                 |
| 118            | 469         | 483        | RLNLSVTSYPNADFD  | 164             | 653            | 667         | VNFVLLHNGFSTGIG |          |                 |
| 119            | 473         | 487        | SVTSPYNADFDGDEM  | 165             | 657            | 671         | LLHNGFSTGIGDTIA |          |                 |
| 120            | 477         | 491        | PYNADFDGDEMNLHV  | 166             | 661            | 675         | GFSTGIGDTIADGPT |          |                 |
| 121            | 481         | 495        | DFDGDDEMNLHVPQSE | 167             | 665            | 679         | GIGDTIADGPTMREI |          |                 |
| 122            | 485         | 499        | DEMNLHVPQSEETRA  | 168             | 669            | 683         | TIADGPTMREITETI |          |                 |
| 123            | 489         | 503        | LHVPQSEETRAELSQ  | 169             | 673            | 687         | GPTMREITETIAEAK |          |                 |
| 124            | 493         | 507        | QSEETRAELSQLCAV  | 170             | 677            | 691         | REITETIAEAKKVL  |          |                 |
| 125            | 497         | 511        | TRAELSQLCAVPLQI  | 171             | 681            | 695         | ETIAEAKKVLVDVTK |          |                 |
| 126            | 501         | 515        | LSQLCAVPLQIVSPQ  | 172             | 685            | 699         | EAKKVLVDVTKEAQA |          |                 |
| 127            | 505         | 519        | CAVPLQIVSPQSNKP  | 173             | 689            | 703         | KVLDVTKEAQANLLT |          |                 |
| 128            | 509         | 523        | LQIVSPQSNKPCMGI  | 174             | 693            | 707         | VTKEAQANLLTAKHG |          |                 |

| Pol II subunit | Peptide No. | Start a.a. | End a.a.        | Sequence        | Pol II subunit | Peptide No. | Start a.a.      | End a.a. | Sequence         |
|----------------|-------------|------------|-----------------|-----------------|----------------|-------------|-----------------|----------|------------------|
| Rpb1           | 175         | 697        | 711             | AQANLLTAKHGMLTR | Rpb1           | 221         | 881             | 895      | QSLDTIGGSDAAFEK  |
|                | 176         | 701        | 715             | LTAKHGMLRESFE   |                | 222         | 885             | 899      | TIGGSDAAFEKRYRV  |
|                | 177         | 705        | 719             | KHGMLRESFEDNVV  |                | 223         | 889             | 903      | SDAAFEKRYRVDLLN  |
|                | 178         | 709        | 723             | TLRESFEDNVVRFNL |                | 224         | 893             | 907      | FEKRYRVDLLNTDHT  |
|                | 179         | 713        | 727             | SFEDNVVRFLEARD  |                | 225         | 897             | 911      | YRVDLLNTDHTLDPS  |
|                | 180         | 717        | 731             | NVVRFLNEARDKAGR |                | 226         | 901             | 915      | LLNTDHTLDPSLLES  |
|                | 181         | 721        | 735             | FLNEARDKAGRLAEV |                | 227         | 905             | 919      | DHTLDPSLLESSEI   |
|                | 182         | 725        | 739             | ARDKAGRLAEVNLKD |                | 228         | 909             | 923      | DPSLLESSEILGDL   |
|                | 183         | 729        | 743             | AGRLAEVNLKDLNNV |                | 229         | 913             | 927      | LESGSEILGDLKLQV  |
|                | 184         | 733        | 747             | AEVNLKDLNNVKQMV |                | 230         | 917             | 931      | SEILGDLKLQVLLDE  |
|                | 185         | 737        | 751             | LKDLNNVKQMVMAGS |                | 231         | 921             | 935      | GDLKLQVLLDEEYKQ  |
|                | 186         | 741        | 755             | NNVKQMVMAGSKGSF |                | 232         | 925             | 939      | LQVLLDEEYKQLVKD  |
|                | 187         | 745        | 759             | QMVMAGSKGSFINIA |                | 233         | 929             | 943      | LDEEYKQLVKDRKFL  |
|                | 188         | 749        | 763             | AGSKGSFINIAQMSA |                | 234         | 933             | 947      | YKQLVKDRKFLREVF  |
|                | 189         | 753        | 767             | GSFINIAQMSACVGQ |                | 235         | 937             | 951      | VKDRKFLREVFVDGE  |
|                | 190         | 757        | 771             | NIAQMSACVGQQSVE |                | 236         | 941             | 955      | KFLREVFVDGEANWP  |
|                | 191         | 761        | 775             | MSACVGQQSVEGKRI |                | 237         | 945             | 959      | EVFVDGEANWPLPVN  |
|                | 192         | 765        | 779             | VGQQSVEGKRIAFGF |                | 238         | 949             | 963      | DGEANWPLPVNIRRI  |
|                | 193         | 769        | 783             | SVEGKRIAFGFVDRT |                | 239         | 953             | 967      | NWPLPVNIRRIQNA   |
|                | 194         | 773        | 787             | KRIAFGFVDRTLPHF |                | 240         | 957             | 971      | PVNIRRIQNAQQTFF  |
|                | 195         | 777        | 791             | FGFVDRTLPHFSKDD |                | 241         | 961             | 975      | RRIIQNAQQTFFHIDH |
|                | 196         | 781        | 795             | DRTLPHFSKDDYSPE |                | 242         | 965             | 979      | QNAQQTFFHIDHTKPS |
| 197            | 785         | 799        | PHFSKDDYSPEKGF  | 243             | 969            | 983         | QTFHIDHTKPSDLTI |          |                  |
| 198            | 789         | 803        | KDDYSPEKGFVENS  | 244             | 973            | 987         | IDHTKPSDLTIKDIV |          |                  |
| 199            | 793         | 807        | SPESKGFVENSYLRG | 245             | 977            | 991         | KPSDLTIKDIVLGVK |          |                  |
| 200            | 797         | 811        | KGFVENSYLRGLTPQ | 246             | 981            | 995         | LTIKDIVLGVKDLQE |          |                  |
| 201            | 801         | 815        | ENSYLRGLTPQEFFF | 247             | 985            | 999         | DIVLGVKDLQENLLV |          |                  |
| 202            | 805         | 819        | LRGLTPQEFFFHAMG | 248             | 989            | 1003        | GVKDLQENLLVLRGK |          |                  |
| 203            | 809         | 823        | TPQEFFFHAMGGREG | 249             | 993            | 1007        | LQENLLVLRGKNEII |          |                  |
| 204            | 813         | 827        | FFFHAMGGREGLIDT | 250             | 997            | 1011        | LLVLRGKNEIIQNAQ |          |                  |
| 205            | 817         | 831        | AMGGREGLIDTAVKT | 251             | 1001           | 1015        | RGKNEIIQNAQRDAV |          |                  |
| 206            | 821         | 835        | REGLIDTAVKTAETG | 252             | 1005           | 1019        | EIIQNAQRDAVTLFC |          |                  |
| 207            | 825         | 839        | IDTAVKTAETGYIQR | 253             | 1009           | 1023        | NAQRDAVTLFCLLR  |          |                  |
| 208            | 829         | 843        | VKTAETGYIQRRLVK | 254             | 1013           | 1027        | DAVTLFCLLRSRLA  |          |                  |
| 209            | 833         | 847        | ETGYIQRRLVKALED | 255             | 1017           | 1031        | LFCLLRSRLATRRV  |          |                  |
| 210            | 837         | 851        | IQRRLVKALEDIMVH | 256             | 1021           | 1035        | LLRSRLATRRVLQEY |          |                  |
| 211            | 841         | 855        | LVKALEDIMVHYDNT | 257             | 1025           | 1039        | RLATRRVLQEYRLTK |          |                  |
| 212            | 845         | 859        | LEDIMVHYDNTTRNS | 258             | 1029           | 1043        | RRVLQEYRLTKQAFD |          |                  |
| 213            | 849         | 863        | MVHYDNTTRNSLGNV | 259             | 1033           | 1047        | QEYRLTKQAFDWVLS |          |                  |
| 214            | 853         | 867        | DNTTRNSLGNVIQFI | 260             | 1037           | 1051        | LTKQAFDWVLSNIEA |          |                  |
| 215            | 857         | 871        | RNSLGNVIQFIYGED | 261             | 1041           | 1055        | AFDWVLSNIEAQFLR |          |                  |
| 216            | 861         | 875        | GNVIQFIYGEDGMDA | 262             | 1045           | 1059        | VLSNIEAQFLRSVVH |          |                  |
| 217            | 865         | 879        | QFIYGEDGMDAAHIE | 263             | 1049           | 1063        | IEAQFLRSVVHPGEM |          |                  |
| 218            | 869         | 883        | GEDGMDAAHIEKQSL | 264             | 1053           | 1067        | FLRSVVHPGEMVGV  |          |                  |
| 219            | 873         | 887        | MDAAHIEKQSLDTIG | 265             | 1057           | 1071        | VVHPGEMVGVLAAS  |          |                  |
| 220            | 877         | 891        | HIEKQSLDTIGGSDA | 266             | 1061           | 1075        | GEMVGVLAASIGEP  |          |                  |

| Pol II subunit | Peptide No. | Start a.a. | End a.a.        | Sequence         | Pol II subunit | Peptide No. | Start a.a.      | End a.a. | Sequence         |
|----------------|-------------|------------|-----------------|------------------|----------------|-------------|-----------------|----------|------------------|
| Rpb1           | 267         | 1065       | 1079            | GVLAAQSIGEPATQM  | Rpb1           | 313         | 1249            | 1263     | DAETEAEDHMLKKI   |
|                | 268         | 1069       | 1083            | AQSIGEPATQMTLNT  |                | 314         | 1253            | 1267     | EAEEDHMLKKIENTM  |
|                | 269         | 1073       | 1087            | GEPATQMTLNTFHFA  |                | 315         | 1257            | 1271     | DHMLKKIENTMLENI  |
|                | 270         | 1077       | 1091            | TQMTLNTFHFAGVAS  |                | 316         | 1261            | 1275     | KKIENTMLENITLRG  |
|                | 271         | 1081       | 1095            | LNTFHFAGVASKKVT  |                | 317         | 1265            | 1279     | NTMLENITLRGVENI  |
|                | 272         | 1085       | 1099            | HFAGVASKKVTSGVP  |                | 318         | 1269            | 1283     | ENITLRGVENIERVV  |
|                | 273         | 1089       | 1103            | VASKKVTSGVPRLKE  |                | 319         | 1273            | 1287     | LRGVENIERVMMKY   |
|                | 274         | 1093       | 1107            | KVTSGVPRLKEILNV  |                | 320         | 1277            | 1291     | ENIERVMMKYDRKV   |
|                | 275         | 1097       | 1111            | GVPRLKEILNVAKNM  |                | 321         | 1281            | 1295     | RVVMMKYDRKVPSP   |
|                | 276         | 1101       | 1115            | LKEILNVAKNMKTPS  |                | 322         | 1285            | 1299     | MKYDRKVPSPGGEYV  |
|                | 277         | 1105       | 1119            | LNVAKNMKTPSLTVY  |                | 323         | 1289            | 1303     | RKVPSPGGEYVKEPE  |
|                | 278         | 1109       | 1123            | KNMKTPSLTVYLEPG  |                | 324         | 1293            | 1307     | SPTGGEYVKEPEWVLE |
|                | 279         | 1113       | 1127            | TPSLTVYLEPGHAAD  |                | 325         | 1297            | 1311     | EYVKEPEWVLETGCV  |
|                | 280         | 1117       | 1131            | TVYLEPGHAADQEQA  |                | 326         | 1301            | 1315     | PEWVLETGCVNLSE   |
|                | 281         | 1121       | 1135            | EPGHAADQEQAQLIR  |                | 327         | 1305            | 1319     | VLETGCVNLSEVMTV  |
|                | 282         | 1125       | 1139            | AADQEQAQLIRSAIE  |                | 328         | 1309            | 1323     | DGVNLSEVMTVPGID  |
|                | 283         | 1129       | 1143            | EQAKLIRSAIEHTTL  |                | 329         | 1313            | 1327     | LSEVMTVPGIDPTRI  |
|                | 284         | 1133       | 1147            | LIRSAIEHTTLKSVT  |                | 330         | 1317            | 1331     | MTVPGIDPTRIYTNS  |
|                | 285         | 1137       | 1151            | AIEHTTLKSVTIASE  |                | 331         | 1321            | 1335     | GIDPTRIYTNSFIDI  |
|                | 286         | 1141       | 1155            | TTLKSVTIASEIYYD  |                | 332         | 1325            | 1339     | TRIYTNSFIDIMEVL  |
|                | 287         | 1145       | 1159            | SVTIASEIYYDPDPR  |                | 333         | 1329            | 1343     | TNSFIDIMEVLGIEA  |
|                | 288         | 1149       | 1163            | ASEIYYDPDPRSTVI  |                | 334         | 1333            | 1347     | IDIMEVLGIEAGRAA  |
|                | 289         | 1153       | 1167            | YYDPDPRSTVIPED   |                | 335         | 1337            | 1351     | EVLGIEAGRAALYKE  |
|                | 290         | 1157       | 1171            | DPRSTVIPEDDEIIQ  |                | 336         | 1341            | 1355     | IEAGRAALYKEVYNNV |
|                | 291         | 1161       | 1175            | TVIPEDEEIIQLHFS  |                | 337         | 1345            | 1359     | RAALYKEVYNNVIASD |
|                | 292         | 1165       | 1179            | EDEEIIQLHFSLLE   |                | 338         | 1349            | 1363     | YKEVYNNVIASDGSYV |
|                | 293         | 1169       | 1183            | IIQLHFSLLEDEAEQ  |                | 339         | 1353            | 1367     | YNNVIASDGSYVNYRH |
|                | 294         | 1173       | 1187            | HFSLLDEAEQSFQD   |                | 340         | 1357            | 1371     | ASDGSYVNYRHMALL  |
|                | 295         | 1177       | 1191            | LDEAEQSFQDQSPW   |                | 341         | 1361            | 1375     | SYVNYRHMALLVDVM  |
|                | 296         | 1181       | 1195            | AEQSFQDQSPWLLRL  |                | 342         | 1365            | 1379     | YRHMALLVDVMTTQG  |
|                | 297         | 1185       | 1199            | FDQDQSPWLLRLELDR |                | 343         | 1369            | 1383     | ALLVDVMTTQGGTSL  |
|                | 298         | 1189       | 1203            | SPWLLRLELDRAAMN  |                | 344         | 1373            | 1387     | DVMTTQGGTSLVTRH  |
| 299            | 1193        | 1207       | LRLELDRAAMNDKDL | 345              | 1377           | 1391        | TQGGTSLVTRHGFNR |          |                  |
| 300            | 1197        | 1211       | LDRAAMNDKDLTMGQ | 346              | 1381           | 1395        | LTSVTRHGFNRNTG  |          |                  |
| 301            | 1201        | 1215       | AMNDKDLTMGQVGER | 347              | 1385           | 1399        | TRHGFNRNTGALMR  |          |                  |
| 302            | 1205        | 1219       | KDLTMGQVGERIKQT | 348              | 1389           | 1403        | FNRNTGALMRCSFE  |          |                  |
| 303            | 1209        | 1223       | MGQVGERIKQTFKND | 349              | 1393           | 1407        | NTGALMRCSFEETVE |          |                  |
| 304            | 1213        | 1227       | GERIKQTFKNDLFVI | 350              | 1397           | 1411        | LMRCSFEETVEILFE |          |                  |
| 305            | 1217        | 1231       | KQTFKNDLFVIWSED | 351              | 1401           | 1415        | SFEETVEILFEAGAS |          |                  |
| 306            | 1221        | 1235       | KNDLFVIWSEDNDEK | 352              | 1405           | 1419        | TVEILFEAGASAELD |          |                  |
| 307            | 1225        | 1239       | FVIWSEDNDEKLIIR | 353              | 1409           | 1423        | LFEAGASAELDDCRG |          |                  |
| 308            | 1229        | 1243       | SEDNDEKLIIRCRVV | 354              | 1413           | 1427        | GASAELDDCRGVSEN |          |                  |
| 309            | 1233        | 1247       | DEKLIIRCRVVRPKS | 355              | 1417           | 1431        | ELDDCRGVSENVILG |          |                  |
| 310            | 1237        | 1251       | IIRCRVVRPKSLDAE | 356              | 1421           | 1435        | CRGVSENVILGQMAP |          |                  |
| 311            | 1241        | 1255       | RVVRPKSLDAETEA  | 357              | 1425           | 1439        | SENVILGQMAPIGTG |          |                  |
| 312            | 1245        | 1259       | PKSLDAETEAEDHM  | 358              | 1429           | 1443        | ILGQMAPIGTGAFDV |          |                  |



| Pol II subunit | Peptide No. | Start a.a. | End a.a.     | Sequence          | Pol II subunit | Peptide No. | Start a.a. | End a.a.        | Sequence        |                  |
|----------------|-------------|------------|--------------|-------------------|----------------|-------------|------------|-----------------|-----------------|------------------|
| Rpb1           | 359         | 1433       | 1447         | MAPIGTGAFDVMIDE   | Rpb1           | 405         | 1617       | 1631            | PSYSPTSPSYSP    |                  |
|                | 360         | 1437       | 1451         | GTGAFDVMIDEESLV   |                | 406         | 1621       | 1635            | PTSPSYSPSYSP    |                  |
|                | 361         | 1441       | 1455         | FDVMIDEESLVKYMYP  |                | 407         | 1625       | 1639            | SYSPTSPSYSP     |                  |
|                | 362         | 1445       | 1459         | IDEESLVKYMPEQKI   |                | 408         | 1629       | 1643            | TSPSYSPSYSP     |                  |
|                | 363         | 1449       | 1463         | SLVKYMPEQKITEIE   |                | 409         | 1633       | 1647            | YSPTSPSYSPSY    |                  |
|                | 364         | 1453       | 1467         | YMPEQKITEIEDGQD   |                | 410         | 1637       | 1651            | SPSYSPSYSP      |                  |
|                | 365         | 1457       | 1471         | QKITEIEDGQDGGVT   |                | 411         | 1641       | 1655            | SPTSPSYSPSY     |                  |
|                | 366         | 1461       | 1475         | EIEDGQDGGVTPYSN   |                | 412         | 1645       | 1659            | PSYSPTSPSYSP    |                  |
|                | 367         | 1465       | 1479         | GQDGGVTPYSNESGL   |                | 413         | 1649       | 1663            | PTSPSYSPSPAYSP  |                  |
|                | 368         | 1469       | 1483         | GVTPYSNESGLVNAD   |                | 414         | 1653       | 1667            | SYSPTSPAYSP     |                  |
|                | 369         | 1473       | 1487         | YSNESGLVNADLDVK   |                | 415         | 1657       | 1671            | TSPAYSPSYSP     |                  |
|                | 370         | 1477       | 1491         | SGLVNADLDVKDELMD  |                | 416         | 1661       | 1675            | YSPTSPSYSPSY    |                  |
|                | 371         | 1481       | 1495         | NADLDVKDELDFMSPL  |                | 417         | 1665       | 1679            | SPSYSPSYSP      |                  |
|                | 372         | 1485       | 1499         | DVKDELDFMSPLVDSG  |                | 418         | 1669       | 1683            | SPTSPSYSPSY     |                  |
|                | 373         | 1489       | 1503         | ELMDFMSPLVDSGSNDA |                | 419         | 1673       | 1687            | PSYSPTSPSYSP    |                  |
|                | 374         | 1493       | 1507         | SPLVDSGSNDAMAGG   |                | 420         | 1677       | 1691            | PTSPSYSPSYSP    |                  |
|                | 375         | 1497       | 1511         | DSGSNDAMAGGFTAY   |                | 421         | 1681       | 1695            | SYSPTSPSYSP     |                  |
|                | 376         | 1501       | 1515         | NDAMAGGFTAYGGAD   |                | 422         | 1685       | 1699            | TSPSYSPSYSP     |                  |
|                | 377         | 1505       | 1519         | AGGFTAYGGADYGEA   |                | 423         | 1689       | 1703            | YSPTSPSYSPSY    |                  |
|                | 378         | 1509       | 1523         | TAYGGADYGEATSPF   |                | 424         | 1693       | 1707            | SPSYSPSYSP      |                  |
|                | 379         | 1513       | 1527         | GADYGEATSPFGAYG   |                | 425         | 1697       | 1711            | SPTSPSYSPGYS    |                  |
|                | 380         | 1517       | 1531         | GEATSPFGAYGEAPT   |                | 426         | 1701       | 1715            | PSYSPTSPGYPGSP  |                  |
|                | 381         | 1521       | 1535         | SPFGAYGEATSPGF    |                | 427         | 1705       | 1719            | PTSPGYPGYPAYSP  |                  |
|                | 382         | 1525       | 1539         | AYGEATSPGFGVSS    |                | 428         | 1709       | 1723            | GYPGYPAYSPKQDE  |                  |
|                | 383         | 1529       | 1543         | APTSPGFGVSSPGFS   |                | 429         | 1713       | 1727            | GSPAYSPKQDEQKHN |                  |
|                | 384         | 1533       | 1547         | PGFGVSSPGFSPTSP   |                | 430         | 1717       | 1731            | YSPKQDEQKHENEN  |                  |
|                | 385         | 1537       | 1551         | VSSPGFSPTPTSP     |                | Rpb1/2      | 431        |                 |                 | QDEQKHENENSRMS   |
|                | 386         | 1541       | 1555         | GFSPPTPTSP        |                |             | 432        |                 |                 | KHENENSRMSDLAN   |
|                | 387         | 1545       | 1559         | TSPTPTSP          |                |             | 433        |                 |                 | NENSRMSDLANSEKY  |
|                | 388         | 1549       | 1563         | YSPTPTSPSY        |                |             | 434        |                 |                 | RMSDLANSEKYDEDE  |
|                | 389         | 1553       | 1567         | SPAYSPSYSP        |                | Rpb2        | 435        | 4               | 18              | LANSEKYDEDEPYGF  |
|                | 390         | 1557       | 1571         | SPTSPSYSP         |                |             | 436        | 8               | 22              | EKYDEDEPYGFEDES  |
|                | 391         | 1561       | 1575         | PSYSPTSPSYSP      |                |             | 437        | 12              | 26              | DEDEPYGFEDESAPIT |
|                | 392         | 1565       | 1579         | PTSPSYSPSYSP      |                |             | 438        | 16              | 30              | YGFEDSAPITAEDS   |
|                | 393         | 1569       | 1583         | SYSPTSPSYSP       |                |             | 439        | 20              | 34              | DESAPITAEDSWAVI  |
|                | 394         | 1573       | 1587         | TSPSYSPSYSP       |                |             | 440        | 24              | 38              | PITAEDSWAVISAFF  |
|                | 395         | 1577       | 1591         | YSPTSPSYSPSY      |                |             | 441        | 28              | 42              | EDSWAVISAFFREKG  |
|                | 396         | 1581       | 1595         | SPSYSPSYSP        |                |             | 442        | 32              | 46              | AVISAFFREKGLVSQ  |
|                | 397         | 1585       | 1599         | SPTSPSYSPSY       |                |             | 443        | 36              | 50              | AFFREKGLVSQLDS   |
|                | 398         | 1589       | 1603         | PSYSPTSPSYSP      |                |             | 444        | 40              | 54              | EKGLVSQLDSFNQF   |
| 399            | 1593        | 1607       | PTSPSYSPSYSP |                   | 445            | 44          | 58         | VSQLDSFNQFVDYD  |                 |                  |
| 400            | 1597        | 1611       | SYSPTSPSYSP  |                   | 446            | 48          | 62         | LDSFNQFVDYDLQDI |                 |                  |
| 401            | 1601        | 1615       | TSPSYSPSYSP  |                   | 447            | 52          | 66         | NQFVDYDLQDIICED |                 |                  |
| 402            | 1605        | 1619       | YSPTSPSYSPSY |                   | 448            | 56          | 70         | DYDLQDIICEDSTLI |                 |                  |
| 403            | 1609        | 1623       | SPSYSPSYSP   |                   | 449            | 60          | 74         | QDIICEDSTLILEQL |                 |                  |
| 404            | 1613        | 1627       | SPTSPSYSPSY  |                   | 450            | 64          | 78         | CEDSLILEQLAQHT  |                 |                  |

| Pol II subunit | Peptide No. | Start a.a. | End a.a. | Sequence        | Pol II subunit | Peptide No. | Start a.a. | End a.a. | Sequence         |
|----------------|-------------|------------|----------|-----------------|----------------|-------------|------------|----------|------------------|
| Rpb2           | 451         | 68         | 82       | TLILEQLAQHTTESD | Rpb2           | 497         | 252        | 266      | STLQVKLYGREGSSA  |
|                | 452         | 72         | 86       | EQLAQHTTESDNISR |                | 498         | 256        | 270      | VKLYGREGSSARTIK  |
|                | 453         | 76         | 90       | QHTTESDNISRKYEI |                | 499         | 260        | 274      | GREGSSARTIKATLP  |
|                | 454         | 80         | 94       | ESDNISRKYEISFGK |                | 500         | 264        | 278      | SSARTIKATLPYIKQ  |
|                | 455         | 84         | 98       | ISRKYEISFGKIYVT |                | 501         | 268        | 282      | TIKATLPYIKQDIPI  |
|                | 456         | 88         | 102      | YEISFGKIYVKPMV  |                | 502         | 272        | 286      | TLPYIKQDIPVIF    |
|                | 457         | 92         | 106      | FGKIYVKPMVNESD  |                | 503         | 276        | 290      | IKQDIPVIFRALG    |
|                | 458         | 96         | 110      | YVTKPMVNESDGVTH |                | 504         | 280        | 294      | IPVIFRALGIIPD    |
|                | 459         | 100        | 114      | PMVNESDGVTHALYP |                | 505         | 284        | 298      | IIFRALGIIPDGEIL  |
|                | 460         | 104        | 118      | ESDGVTHALYPQEAR |                | 506         | 288        | 302      | ALGIIPDGEILEHIC  |
|                | 461         | 108        | 122      | VTHALYPQEARLRNL |                | 507         | 292        | 306      | IPDGEILEHICYDVN  |
|                | 462         | 112        | 126      | LYPQEARLRNLTYSS |                | 508         | 296        | 310      | EILEHICYDVNDWQM  |
|                | 463         | 116        | 130      | EARLRNLTYSSGLFV |                | 509         | 300        | 314      | HICYDVNDWQMLEML  |
|                | 464         | 120        | 134      | RNLTYSSGLFVDVKK |                | 510         | 304        | 318      | DVNDWQMLEMLKPCV  |
|                | 465         | 124        | 138      | YSSGLFVDVKKRTYE |                | 511         | 308        | 322      | WQMLEMLKPCVEDGFG |
|                | 466         | 128        | 142      | LFVDVKKRTYEAIDV |                | 512         | 312        | 326      | EMLKPCVEDGFVIQD  |
|                | 467         | 132        | 146      | VKKRTYEAIDVPGRE |                | 513         | 316        | 330      | PCVEDGFVIQDRETA  |
|                | 468         | 136        | 150      | TYEAIDVPGRELKYE |                | 514         | 320        | 334      | DGFVIQDRETALDFI  |
|                | 469         | 140        | 154      | IDVPGRELKYELIAE |                | 515         | 324        | 338      | IQDRETALDFIGRRG  |
|                | 470         | 144        | 158      | GRELKYELIAEESD  |                | 516         | 328        | 342      | ETALDFIGRRGTALG  |
|                | 471         | 148        | 162      | KYELIAEESDSESES |                | 517         | 332        | 346      | DFIGRRGTALGIKKE  |
|                | 472         | 152        | 166      | IAEESDSESGKVF   |                | 518         | 336        | 350      | RRGTALGIKKEKRIQ  |
|                | 473         | 156        | 170      | SEDSGKVFIGRL    |                | 519         | 340        | 354      | ALGIKKEKRIQYAKD  |
|                | 474         | 160        | 174      | SESGKVFIGRLPIML |                | 520         | 344        | 358      | KKEKRIQYAKDILQK  |
|                | 475         | 164        | 178      | KVFIGRLPIMLRSKN |                | 521         | 348        | 362      | RIQYAKDILQKEFLP  |
|                | 476         | 168        | 182      | GRLPIMLRSKNCYLS |                | 522         | 352        | 366      | AKDILQKEFLPHITQ  |
|                | 477         | 172        | 186      | IMLRSKNCYLSEATE |                | 523         | 356        | 370      | LQKEFLPHITQLEGF  |
|                | 478         | 176        | 190      | SKNCYLSEATESDLY |                | 524         | 360        | 374      | FLPHITQLEGFESRK  |
|                | 479         | 180        | 194      | YLSEATESDLYKLKE |                | 525         | 364        | 378      | ITQLEGFESRKAFFL  |
|                | 480         | 184        | 198      | ATESDLYKLKECPFD |                | 526         | 368        | 382      | EGFESRKAFFLGYMI  |
|                | 481         | 188        | 202      | DLYKLKECPFDMGGY |                | 527         | 372        | 386      | SRKAFFLGYMINRLL  |
|                | 482         | 192        | 206      | LKECPFDMGGYFIIN |                | 528         | 376        | 390      | FFLGYMINRLLLCAL  |
|                | 483         | 196        | 210      | PFDMGGYFIINGSEK |                | 529         | 380        | 394      | YMINRLLLCALDRKD  |
|                | 484         | 200        | 214      | GGYFIINGSEKVLIA |                | 530         | 384        | 398      | RLLLCALDRKDQDDR  |
|                | 485         | 204        | 218      | IINGSEKVLIAQERS |                | 531         | 388        | 402      | CALDRKDQDRDHFG   |
|                | 486         | 208        | 222      | SEKVLIAQERSAGNI |                | 532         | 392        | 406      | RKDQDRDHFGKKRL   |
|                | 487         | 212        | 226      | LIAQERSAGNIVQVF |                | 533         | 396        | 410      | DDRDHFGKKRLDLAG  |
|                | 488         | 216        | 230      | ERSAGNIVQVFKKAA |                | 534         | 400        | 414      | HFGKKRLDLAGPLLA  |
|                | 489         | 220        | 234      | GNIVQVFKKAAPSPI |                | 535         | 404        | 418      | KRLDLAGPLLAQLFK  |
|                | 490         | 224        | 238      | QVFKKAAPSPISHVA |                | 536         | 408        | 422      | LAGPLLAQLFKTLFK  |
|                | 491         | 228        | 242      | KAAPSPISHVAEIRS |                | 537         | 412        | 426      | LLAQLFKTLFKKLT   |
|                | 492         | 232        | 246      | SPISHVAEIRSALEK |                | 538         | 416        | 430      | LFKTLFKKLTKDIFR  |
|                | 493         | 236        | 250      | HVAEIRSALEKGSRF |                | 539         | 420        | 434      | LFKLTKDIFRYMQR   |
|                | 494         | 240        | 254      | IRSALEKGSRFISTL |                | 540         | 424        | 438      | LTKDIFRYMQRTVEE  |
|                | 495         | 244        | 258      | LEKGSRFISTLQVKL |                | 541         | 428        | 442      | IFRYMQRTVEEAHDF  |
|                | 496         | 248        | 262      | SRFISTLQVKLYGRE |                | 542         | 432        | 446      | MQRTVEEAHDFNMKL  |

| Pol II subunit | Peptide No. | Start a.a. | End a.a.        | Sequence        | Pol II subunit | Peptide No. | Start a.a.       | End a.a. | Sequence         |
|----------------|-------------|------------|-----------------|-----------------|----------------|-------------|------------------|----------|------------------|
| Rpb2           | 543         | 436        | 450             | VEEAHDFNMKLAINA | Rpb2           | 589         | 620              | 634      | REKELKIFTDAGRVI  |
|                | 544         | 440        | 454             | HDFNMKLAINAKTIT |                | 590         | 624              | 638      | LKIFTDAGRVIYRPLF |
|                | 545         | 444        | 458             | MKLAINAKTITSGLK |                | 591         | 628              | 642      | TDAGRVIYRPLFIVED |
|                | 546         | 448        | 462             | INAKTITSGLKYALA |                | 592         | 632              | 646      | RVYRPLFIVEDDESL  |
|                | 547         | 452        | 466             | TITSGLYALATGNW  |                | 593         | 636              | 650      | PLFIVEDDESLGHKE  |
|                | 548         | 456        | 470             | GLKYALATGNWGEQK |                | 594         | 640              | 654      | VEDDESLGHKELKVR  |
|                | 549         | 460        | 474             | ALATGNWGEQKAMS  |                | 595         | 644              | 658      | ESLGHKELKVRKGHI  |
|                | 550         | 464        | 478             | GNWGEQKAMSSRAG  |                | 596         | 648              | 662      | HKELKVRKGHIKLM   |
|                | 551         | 468        | 482             | EQKAMSSRAGVSQV  |                | 597         | 652              | 666      | KVRKGHIKLMATEY   |
|                | 552         | 472        | 486             | AMSSRAGVSQVLNRY |                | 598         | 656              | 670      | GHIKLMATEYQDIE   |
|                | 553         | 476        | 490             | RAGVSQVLNRYTYSS |                | 599         | 660              | 674      | KLMATEYQDIEGGFE  |
|                | 554         | 480        | 494             | SQVLNRYTYSSTLSH |                | 600         | 664              | 678      | TEYQDIEGGFEDVEE  |
|                | 555         | 484        | 498             | NRYTYSSTLSHLRRT |                | 601         | 668              | 682      | DIEGGFEDVEEYTW   |
|                | 556         | 488        | 502             | YSSTLSHLRRTNTPI |                | 602         | 672              | 686      | GFEDVEEYTWSSLLN  |
|                | 557         | 492        | 506             | LSHLRRTNTPIGRDG |                | 603         | 676              | 690      | VEEYTWSSLLNEGLV  |
|                | 558         | 496        | 510             | RRTNTPIGRDGKLA  |                | 604         | 680              | 694      | TWSSLLNEGLVEYID  |
|                | 559         | 500        | 514             | TPIGRDGKLAQPRQL |                | 605         | 684              | 698      | LLNEGLVEYIDAE    |
|                | 560         | 504        | 518             | RDGKLAQPRQLHNTH |                | 606         | 688              | 702      | GLVEYIDAEESIL    |
|                | 561         | 508        | 522             | LAKPRQLHNTHWGLV |                | 607         | 692              | 706      | YIDAEESILIAMQ    |
|                | 562         | 512        | 526             | RQLHNTHWGLVCPAE |                | 608         | 696              | 710      | EEESILIAMQPEDL   |
|                | 563         | 516        | 530             | NTHWGLVCPAETPEG |                | 609         | 700              | 714      | SILIAMQPEDLEPAE  |
|                | 564         | 520        | 534             | GLVCPAETPEGQACG |                | 610         | 704              | 718      | AMQPEDLEPAEANE   |
|                | 565         | 524        | 538             | PAETPEGQACGLVKN |                | 611         | 708              | 722      | EDLEPAEANEENDLD  |
|                | 566         | 528        | 542             | PEGQACGLVKNLSLM |                | 612         | 712              | 726      | PAEANEENDLDVDP   |
|                | 567         | 532        | 546             | ACGLVKNLSMSCIS  |                | 613         | 716              | 730      | NEENDLDVDPKRIR   |
|                | 568         | 536        | 550             | VKNLSMSCISVGTG  |                | 614         | 720              | 734      | DLVDVDPKRIRVSHH  |
|                | 569         | 540        | 554             | SLMSCISVGTDPMP  |                | 615         | 724              | 738      | DPKRIRVSHHATTF   |
|                | 570         | 544        | 558             | CISVGTDPMPIITFL |                | 616         | 728              | 742      | RIRVSHHATTFTHCE  |
|                | 571         | 548        | 562             | GTDPMPIITFLSEWG |                | 617         | 732              | 746      | SHHATTFTHCEIHPS  |
|                | 572         | 552        | 566             | MPIITFLSEWGMEPL |                | 618         | 736              | 750      | TTFTHCEIHPSMILG  |
|                | 573         | 556        | 570             | TFLSEWGMEPLEDYV |                | 619         | 740              | 754      | HCEIHPSMILGVAAS  |
|                | 574         | 560        | 574             | EWGMEPLEDYVPHQS |                | 620         | 744              | 758      | HPSMILGVAASIIPF  |
|                | 575         | 564        | 578             | EPLYDYVPHQSPDAT |                | 621         | 748              | 762      | ILGVAASIIPFPDHN  |
|                | 576         | 568        | 582             | DYVPHQSPDATRVFV |                | 622         | 752              | 766      | AASIIPFPDHNQSPR  |
| 577            | 572         | 586        | HQSPDATRVFVNGVW | 623             | 756            | 770         | IPFPDHNQSPRNTYQ  |          |                  |
| 578            | 576         | 590        | DATRVFVNGVWHGVH | 624             | 760            | 774         | DHNQSPRNTYQSAMG  |          |                  |
| 579            | 580         | 594        | VFVNGVWHGVHRNPA | 625             | 764            | 778         | SPRNTYQSAMGKQAM  |          |                  |
| 580            | 584         | 598        | GVWHGVHRNPARLME | 626             | 768            | 782         | TYQSAMGKQAMGVFL  |          |                  |
| 581            | 588         | 602        | GVHRNPARLME     | 627             | 772            | 786         | AMGKQAMGVFLTNYN  |          |                  |
| 582            | 592         | 606        | NPARLME         | 628             | 776            | 790         | QAMGVFLTNYNVRMD  |          |                  |
| 583            | 596         | 610        | LMETLRLRRKGDIN  | 629             | 780            | 794         | VFLTNYNVRMDTMAN  |          |                  |
| 584            | 600         | 614        | LRLRRKGDINPEVS  | 630             | 784            | 798         | NYNVRMDTMANILYY  |          |                  |
| 585            | 604         | 618        | RRKGDINPEVSMIRD | 631             | 788            | 802         | RMDTMANILYYPQKP  |          |                  |
| 586            | 608         | 622        | DINPEVSMIRDIREK | 632             | 792            | 806         | MANILYYPQKPLGTT  |          |                  |
| 587            | 612         | 626        | EVS             | 633             | 796            | 810         | LYYPQKPLGTTTRAME |          |                  |
| 588            | 616         | 630        | IRDIREKELKIFTDA | 634             | 800            | 814         | QKPLGTTTRAMEYLF  |          |                  |

| Pol II subunit | Peptide No. | Start a.a. | End a.a.        | Sequence         | Pol II subunit | Peptide No. | Start a.a.      | End a.a. | Sequence         |
|----------------|-------------|------------|-----------------|------------------|----------------|-------------|-----------------|----------|------------------|
| Rpb2           | 635         | 804        | 818             | GTTRAMEYLKFRELP  | Rpb2           | 681         | 988             | 1002     | GTIGITYRREDMPFT  |
|                | 636         | 808        | 822             | AMEYLKFRELPAGQN  |                | 682         | 992             | 1006     | ITYRREDMPFTAEGI  |
|                | 637         | 812        | 826             | LKFRELPAGQNAIVA  |                | 683         | 996             | 1010     | REDMPFTAEGIVPDL  |
|                | 638         | 816        | 830             | ELPAGQNAIVAIAICY |                | 684         | 1000            | 1014     | PFTAEGIVPDLIINP  |
|                | 639         | 820        | 834             | GQNAIVAIAICYSGYN |                | 685         | 1004            | 1018     | EGIVPDLIINPHAIP  |
|                | 640         | 824        | 838             | IVAIAICYSGYNQEDS |                | 686         | 1008            | 1022     | PDLIINPHAIPSRMT  |
|                | 641         | 828        | 842             | ACYSGYNQEDSMIMN  |                | 687         | 1012            | 1026     | INPHAIPSRMTVAHL  |
|                | 642         | 832        | 846             | GYNQEDSMIMNQSSI  |                | 688         | 1016            | 1030     | AIPSRMTVAHLIECL  |
|                | 643         | 836        | 850             | EDSMIMNQSSIDRGL  |                | 689         | 1020            | 1034     | RMTVAHLIECLLSKV  |
|                | 644         | 840        | 854             | IMNQSSIDRGLFRSL  |                | 690         | 1024            | 1038     | AHLIECLLSKVAALS  |
|                | 645         | 844        | 858             | SSIDRGLFRSLFFRS  |                | 691         | 1028            | 1042     | ECLLSKVAALSGNEG  |
|                | 646         | 848        | 862             | RGLFRSLFFRSYMDQ  |                | 692         | 1032            | 1046     | SKVAALSGNEGDAASP |
|                | 647         | 852        | 866             | RSLFFRSYMDQEKKY  |                | 693         | 1036            | 1050     | ALSGNEGDAASPFTDI |
|                | 648         | 856        | 870             | FRSYMDQEKKYGMSI  |                | 694         | 1040            | 1054     | NEGDAASPFTDITVEG |
|                | 649         | 860        | 874             | MDQEKKYGMSITETF  |                | 695         | 1044            | 1058     | ASPFTDITVEGISKL  |
|                | 650         | 864        | 878             | KKYGMSITETFEKPQ  |                | 696         | 1048            | 1062     | TDITVEGISKLLREH  |
|                | 651         | 868        | 882             | MSITETFEKPQRTNT  |                | 697         | 1052            | 1066     | VEGISKLLREHGYQS  |
|                | 652         | 872        | 886             | ETFEKPQRTNTRLRMK |                | 698         | 1056            | 1070     | SKLLREHGYQSRGFE  |
|                | 653         | 876        | 890             | KPQRTNTRLRMKHGTY |                | 699         | 1060            | 1074     | REHGYQSRGFVEMYN  |
|                | 654         | 880        | 894             | TNTRLRMKHGTYDKLD |                | 700         | 1064            | 1078     | YQSRGFVEMYNGHTG  |
|                | 655         | 884        | 898             | RMKHGTYDKLDDDGL  |                | 701         | 1068            | 1082     | GFEVEMYNGHTGKKLM |
|                | 656         | 888        | 902             | GTYDKLDDDGLIAPG  |                | 702         | 1072            | 1086     | MYNGHTGKKLMAQIF  |
|                | 657         | 892        | 906             | KLDDDGLIAPGVRVS  |                | 703         | 1076            | 1090     | HTGKKLMAQIFFGPT  |
|                | 658         | 896        | 910             | DGLIAPGVRVSGEDV  |                | 704         | 1080            | 1094     | KLMAQIFFGPTYQQR  |
|                | 659         | 900        | 914             | APGVRVSGEDVIIGK  |                | 705         | 1084            | 1098     | QIFFGPTYQQLRHM   |
|                | 660         | 904        | 918             | RVSGEDVIIGKTTPI  |                | 706         | 1088            | 1102     | GPTYQQLRHMVDDK   |
|                | 661         | 908        | 922             | EDVIIGKTTPISPDE  |                | 707         | 1092            | 1106     | YQRLRHMVDDKIHAR  |
|                | 662         | 912        | 926             | IGKTTPISPDEEELG  |                | 708         | 1096            | 1110     | RHMVDDKIHARARGP  |
|                | 663         | 916        | 930             | TPISPDEEELGQRTA  |                | 709         | 1100            | 1114     | DDKIHARARGPMQVL  |
|                | 664         | 920        | 934             | PDEEELGQRTAYHSK  |                | 710         | 1104            | 1118     | HARARGPMQVLTRQP  |
|                | 665         | 924        | 938             | ELGQRTAYHSKRDAS  |                | 711         | 1108            | 1122     | RGPMQVLTRQPVVEGR |
|                | 666         | 928        | 942             | RTAYHSKRDASTPLR  |                | 712         | 1112            | 1126     | QVLTRQPVVEGRSRDG |
|                | 667         | 932        | 946             | HSKRDASTPLRSTEN  |                | 713         | 1116            | 1130     | RQPVEGRSRDGGGLRF |
|                | 668         | 936        | 950             | DASTPLRSTENGIVD  |                | 714         | 1120            | 1134     | EGRSRDGGGLRFGEME |
|                | 669         | 940        | 954             | PLRSTENGIVDQVLV  |                | 715         | 1124            | 1138     | RDGGGLRFGEMERDCM |
|                | 670         | 944        | 958             | TENGIVDQVLVTTNQ  |                | 716         | 1128            | 1142     | LRFGEMERDCMIAHG  |
|                | 671         | 948        | 962             | IVDQVLVTTNQDGLK  |                | 717         | 1132            | 1146     | EMERDCMIAHGAASF  |
|                | 672         | 952        | 966             | VLVTTNQDGLKFKVKV |                | 718         | 1136            | 1150     | DCMIAHGAASFLKER  |
|                | 673         | 956        | 970             | TNQDGLKFKVVRVRT  |                | 719         | 1140            | 1154     | AHGAASFLKERLMEA  |
|                | 674         | 960        | 974             | GLKFKVVRVRTTKIP  |                | 720         | 1144            | 1158     | ASFLKERLMEASDAF  |
| 675            | 964         | 978        | VKVRVRTTKIPQIGD | 721              | 1148           | 1162        | KERLMEASDAFRVHI |          |                  |
| 676            | 968         | 982        | VRTTKIPQIGDKFAS | 722              | 1152           | 1166        | MEASDAFRVHICGIC |          |                  |
| 677            | 972         | 986        | KIPQIGDKFASRHGQ | 723              | 1156           | 1170        | DAFRVHICIGCLMT  |          |                  |
| 678            | 976         | 990        | IGDKFASRHGQKGTI | 724              | 1160           | 1174        | VHICIGCLMTVIAK  |          |                  |
| 679            | 980         | 994        | FASRHGQKGTIGITY | 725              | 1164           | 1178        | GICGLMTVIAKLNHN |          |                  |
| 680            | 984         | 998        | HGQKGTIGITYRRED | 726              | 1168           | 1182        | LMTVIAKLNHNQFEC |          |                  |

| Pol II subunit | Peptide No. | Start a.a. | End a.a. | Sequence         | Pol II subunit | Peptide No. | Start a.a. | End a.a.         | Sequence         |
|----------------|-------------|------------|----------|------------------|----------------|-------------|------------|------------------|------------------|
| <b>Rpb2</b>    | 727         | 1172       | 1186     | IAKLNHNQFECKGCD  | <b>Rpb3</b>    | 773         | 132        | 146              | PIIQDKEGNGVLICK  |
|                | 728         | 1176       | 1190     | NHNQFECKGCDNKID  |                | 774         | 136        | 150              | DKEGNGVLICKLRKKG |
|                | 729         | 1180       | 1194     | FECKGCDNKIDIYQI  |                | 775         | 140        | 154              | NGVLICKLRKKGQELK |
|                | 730         | 1184       | 1198     | GCDNKIDIYQIHIPY  |                | 776         | 144        | 158              | ICKLRKKGQELKLCV  |
|                | 731         | 1188       | 1202     | KIDIYQIHIPYAAKL  |                | 777         | 148        | 162              | RKGQELKLCVAKKG   |
|                | 732         | 1192       | 1206     | YQIHIPYAAKLLFQE  |                | 778         | 152        | 166              | ELKLCVAKKGIAKE   |
|                | 733         | 1196       | 1210     | IPYAAKLLFQELMAM  |                | 779         | 156        | 170              | TCVAKKGAKEHAKW   |
|                | 734         | 1200       | 1214     | AKLLFQELMAMNITP  |                | 780         | 160        | 174              | KKGIAKEHAKWGPAA  |
|                | 735         | 1204       | 1218     | FQELMAMNITPRLYT  |                | 781         | 164        | 178              | AKEHAKWGPAAAEF   |
|                | 736         | 1208       | 1222     | MAMNITPRLYTDRSR  |                | 782         | 168        | 182              | AKWGPAAAEFEYDP   |
| Rpb2/3         | 737         |            |          | ITPRLYTDRSRDFMS  | 783            | 172         | 186        | PAAAEFEYDPWNKL   |                  |
|                | 738         |            |          | LYTDRSRDFMSEEGP  | 784            | 176         | 190        | IEFEYDPWNKLKHTD  |                  |
|                | 739         |            |          | RSRDFMSEEGPQVKI  | 785            | 180         | 194        | YDPWNKLKHTDYWYE  |                  |
|                | 740         |            |          | FMSEEGPQVKIREAS  | 786            | 184         | 198        | NKLKHTDYWYEQDSA  |                  |
| <b>Rpb3</b>    | 741         | 4          | 18       | EGPQVKIREASKDNV  | 787            | 188         | 202        | HTDYWYEQDSAKEWP  |                  |
|                | 742         | 8          | 22       | VKIREASKDNVDFIL  | 788            | 192         | 206        | WYEQDSAKEWPQSKN  |                  |
|                | 743         | 12         | 26       | EASKDNVDFILSNVD  | 789            | 196         | 210        | DSAKEWPQSKNCEYE  |                  |
|                | 744         | 16         | 30       | DNVDFILSNVDLAMA  | 790            | 200         | 214        | EWPPQSKNCEYEDPPN |                  |
|                | 745         | 20         | 34       | FILSNVDLAMANSR   | 791            | 204         | 218        | SKNCEYEDPPNEGDP  |                  |
|                | 746         | 24         | 38       | NVDLAMANSRRLVMI  | 792            | 208         | 222        | EYEDPPNEGDPFDYK  |                  |
|                | 747         | 28         | 42       | AMANSRRLVMIAEIP  | 793            | 212         | 226        | PPNEGDPFDYKAQAD  |                  |
|                | 748         | 32         | 46       | SLRRVMIAEIPTLAI  | 794            | 216         | 230        | GDPFDYKAQADTFYM  |                  |
|                | 749         | 36         | 50       | VMIAEIPTLAIDSVE  | 795            | 220         | 234        | DYKAQADTFYMNVES  |                  |
|                | 750         | 40         | 54       | EIPTLAIDSVEVETN  | 796            | 224         | 238        | QADTFYMNVESVSGI  |                  |
|                | 751         | 44         | 58       | LAIDSVEVETNTTVL  | 797            | 228         | 242        | FYMNVESVGSIPVDQ  |                  |
|                | 752         | 48         | 62       | SVEVETNTTVLADEF  | 798            | 232         | 246        | VESVGSIPVDQVVVR  |                  |
|                | 753         | 52         | 66       | ETNTTVLADEFIAHR  | 799            | 236         | 250        | GSIPVDQVVVRGIDT  |                  |
|                | 754         | 56         | 70       | TVLADEFIAHRLGLI  | 800            | 240         | 254        | VDQVVVRGIDTLQKK  |                  |
|                | 755         | 60         | 74       | DEFIAHRLGLIPLQS  | 801            | 244         | 258        | VVRGIDTLQKKVASI  |                  |
|                | 756         | 64         | 78       | AHRLGLIPLQSM DIE | 802            | 248         | 262        | IDTLQKKVASILLAL  |                  |
|                | 757         | 68         | 82       | GLIPLQSM DIEQLEY | 803            | 252         | 266        | QKKVASILLALTQMD  |                  |
|                | 758         | 72         | 86       | LQSM DIEQLEYSRDC | 804            | 256         | 270        | ASILLALTQMDQDKV  |                  |
|                | 759         | 76         | 90       | DIEQLEYSRDCFCED  | 805            | 260         | 274        | LALTQMDQDKVNFAS  |                  |
|                | 760         | 80         | 94       | LEYSRDCFCEDHCDK  | 806            | 264         | 278        | QMDQDKVNFASGDNN  |                  |
|                | 761         | 84         | 98       | RDCFCEDHCDKCSVV  | 807            | 268         | 282        | DKVNFASGDNNNTASN |                  |
|                | 762         | 88         | 102      | CEDHCDKCSVVLTLQ  | 808            | 272         | 286        | FASGDNNNTASNMLGS |                  |
|                | 763         | 92         | 106      | CDKCSVVLTLQAFGE  | 809            | 276         | 290        | DNNTASNMLGSNEDV  |                  |
|                | 764         | 96         | 110      | SVVLTLQAFGESEST  | 810            | 280         | 294        | ASNMLGSNEDVMMTG  |                  |
|                | 765         | 100        | 114      | TLQAFGESESTTVVY  | 811            | 284         | 298        | LGSNEDVMMTGAEQD  |                  |
|                | 766         | 104        | 118      | FGESESTTVVYSKDL  | 812            | 288         | 302        | EDVMMTGAEQDPYSN  |                  |
|                | 767         | 108        | 122      | ESTTVVYSKDLVIVS  | 813            | 292         | 306        | MTGAEQDPYSNASQM  |                  |
|                | 768         | 112        | 126      | NVYSKDLVIVSNLMG  | 814            | 296         | 310        | EQDPYSNASQMGNTG  |                  |
|                | 769         | 116        | 130      | KDLVIVSNLMGRNIG  | 815            | 300         | 314        | YSNASQMGNTGSGGY  |                  |
|                | 770         | 120        | 134      | IVSNLMGRNIGHPII  | 816            | 304         | 318        | SQMGNTGSGGYDNAAF |                  |
|                | 771         | 124        | 138      | LMGRNIGHPIIQDKE  | Rpb3/4         | 817         |            |                  | NTGSGGYDNAWMNVS  |
|                | 772         | 128        | 142      | NIGHPIIQDKEGNGV  |                | 818         |            |                  | GGYDNAWMNVSTSTF  |

| Pol II subunit | Peptide No. | Start a.a. | End a.a.        | Sequence        | Pol II subunit | Peptide No. | Start a.a.       | End a.a. | Sequence         |                 |
|----------------|-------------|------------|-----------------|-----------------|----------------|-------------|------------------|----------|------------------|-----------------|
| Rpb4           | 819         |            |                 | NAWMNVSTSTFQTRR | Rpb4/5         | 865         | 182              | 196      | SLACDTADEAKTLIP  |                 |
|                | 820         | 2          | 16              | NVSTSTFQTRRRRLK |                | 866         | 186              | 200      | DTADEAKTLIPSLNN  |                 |
|                | 821         | 6          | 20              | STFQTRRRRLKKVEE |                | 867         | 190              | 204      | EAKTLIPSLNNKISD  |                 |
|                | 822         | 10         | 24              | TRRRRLKKVEEENA  |                | 868         | 194              | 208      | LIPSLNNKISDDELE  |                 |
|                | 823         | 14         | 28              | RLKKVEEENAATLQ  |                | 869         | 198              | 212      | LNNKISDDELERILK  |                 |
|                | 824         | 18         | 32              | VEEENAATLQLGQE  |                | 870         | 202              | 216      | ISDDELERILKELSN  |                 |
|                | 825         | 22         | 36              | ENAATLQLGQEFQLK |                | 871         | 206              | 220      | ELERILKELSNLETL  |                 |
|                | 826         | 26         | 40              | TLQLGQEFQLKQINH |                | 872         |                  |          | ILKELSNLETLMDQ   |                 |
|                | 827         | 30         | 44              | GQEFQLKQINHQQEE |                | 873         |                  |          | LSNLETLMDQENER   |                 |
|                | 828         | 34         | 48              | QLKQINHQQEEEELI |                | 874         |                  |          | ETLYMDQENERNISR  |                 |
|                | 829         | 38         | 52              | INHQQEEEELIALNL |                | Rpb5        | 875              | 1        | 15               | MDQENERNISRLWRA |
|                | 830         | 42         | 56              | GEEEELIALNLSEAR |                | 876         | 5                | 19       | NERNISRLWRAFRTV  |                 |
|                | 831         | 46         | 60              | ELIALNLSEARLVK  |                | 877         | 9                | 23       | ISRLWRAFRTVKEMV  |                 |
|                | 832         | 50         | 64              | LNLSEARLVKEALV  |                | 878         | 13               | 27       | WRAFRTVKEMVKDRG  |                 |
|                | 833         | 54         | 68              | EARLVKEALVERRR  |                | 879         | 17               | 31       | RTVKEMVKDRGYFIT  |                 |
|                | 834         | 58         | 72              | VIKEALVERRRAFKR |                | 880         | 21               | 35       | EMVKDRGYFITQEEV  |                 |
|                | 835         | 62         | 76              | ALVERRRAFKRSQKK |                | 881         | 25               | 39       | DRGYFITQEEVELPL  |                 |
|                | 836         | 66         | 80              | RRRAFKRSQKKHKKK |                | 882         | 29               | 43       | FITQEEVELPLEDFK  |                 |
|                | 837         | 70         | 84              | FKRSQKKHKKHKLKH |                | 883         | 33               | 47       | ELEVELPLEDFKAKYC |                 |
|                | 838         | 74         | 88              | QKKHKKHKLKHENAN |                | 884         | 37               | 51       | LPLEDFKAKYCDSMG  |                 |
|                | 839         | 78         | 92              | KKHKLKHENANDETT |                | 885         | 41               | 55       | DFKAKYCDSMGRPQR  |                 |
|                | 840         | 82         | 96              | LKHENANDETTAVED |                | 886         | 45               | 59       | KYCDSMGRPQRKMMS  |                 |
|                | 841         | 86         | 100             | NANDETTAVEDEDDD |                | 887         | 49               | 63       | SMGRPQRKMMSFQAN  |                 |
|                | 842         | 90         | 104             | ETTAVEDEDDDLDED |                | 888         | 53               | 67       | PQRKMMSFQANPTEE  |                 |
|                | 843         | 94         | 108             | VEDEDDDLDEDDVNA |                | 889         | 57               | 71       | MMSFQANPTEESISK  |                 |
|                | 844         | 98         | 112             | DDDLDEDDVNADDDD |                | 890         | 61               | 75       | QANPTEESISKFPDM  |                 |
|                | 845         | 102        | 116             | DEDDVNADDDDFMHS |                | 891         | 65               | 79       | TEESISKFPDMGSLW  |                 |
|                | 846         | 106        | 120             | VNADDDDFMHSETRE |                | 892         | 69               | 83       | ISKFPDMGSLWVEFC  |                 |
|                | 847         | 110        | 124             | DDDFMHSETREKELE |                | 893         | 73               | 87       | PDMGSLWVEFCDEPS  |                 |
|                | 848         | 114        | 128             | MHSETREKELESIDV |                | 894         | 77               | 91       | SLWVEFCDEPSVGVK  |                 |
|                | 849         | 118        | 132             | TREKELESIDVLEQ  |                | 895         | 81               | 95       | EFCDEPSVGVKTMKT  |                 |
|                | 850         | 122        | 136             | ELESIDVLEQTTGG  |                | 896         | 85               | 99       | EPSVGVKTMKTFVIH  |                 |
| 851            | 126         | 140        | IDVLEQTTGGNNKD  | 897             | 89             | 103         | GVKTMKTFVIHQEK   |          |                  |                 |
| 852            | 130         | 144        | LEQTTGGNNKDLKNT | 898             | 93             | 107         | MKTFVIHQEKNFQT   |          |                  |                 |
| 853            | 134         | 148        | TGGNNKDLKNTMQYL | 899             | 97             | 111         | VIHQEKNFQTGIFV   |          |                  |                 |
| 854            | 138         | 152        | NKDLKNTMQYLTNFS | 900             | 101            | 115         | QEKNFQTGIFVYQNN  |          |                  |                 |
| 855            | 142         | 156        | KNTMQYLTNFSRFRD | 901             | 105            | 119         | FQTGIFVYQNNITPS  |          |                  |                 |
| 856            | 146         | 160        | QYLTNFSRFRDQETV | 902             | 109            | 123         | IFVYQNNITPSAMKL  |          |                  |                 |
| 857            | 150         | 164        | NFSRFRDQETVGAVI | 903             | 113            | 127         | QNNITPSAMKLVPSI  |          |                  |                 |
| 858            | 154         | 168        | FRDQETVGAVIQLLK | 904             | 117            | 131         | TPSAMKLVPSIPPAT  |          |                  |                 |
| 859            | 158         | 172        | ETVGAVIQLLKSTGL | 905             | 121            | 135         | MKLVPSIPPATIEF   |          |                  |                 |
| 860            | 162         | 176        | AVIQLLKSTGLHPFE | 906             | 125            | 139         | PSIPPATIEFNAAA   |          |                  |                 |
| 861            | 166         | 180        | LLKSTGLHPFEVAQL | 907             | 129            | 143         | PATIEFNAAALVVN   |          |                  |                 |
| 862            | 170         | 184        | TGLHPFEVAQLGSLA | 908             | 133            | 147         | ETFNAAALVVNITHH  |          |                  |                 |
| 863            | 174         | 188        | PFEVAQLGSLACDTA | 909             | 137            | 151         | EAAALVVNITHHELVP |          |                  |                 |
| 864            | 178         | 192        | AQLGSLACDTADEAK | 910             | 141            | 155         | VVNITHHELVPKHIR  |          |                  |                 |

| Pol II subunit | Peptide No. | Start a.a. | End a.a. | Sequence         | Pol II subunit | Peptide No. | Start a.a. | End a.a. | Sequence         |
|----------------|-------------|------------|----------|------------------|----------------|-------------|------------|----------|------------------|
|                | 911         | 145        | 159      | THHELVPKHIRLSSD  |                | 957         | 114        | 128      | ETDPLRIAMKELAEK  |
|                | 912         | 149        | 163      | LVPKHIRLSSDEKRE  |                | 958         | 118        | 132      | LRIAMKELAEKKIPL  |
|                | 913         | 153        | 167      | HIRLSSDEKRELLKR  |                | 959         | 122        | 136      | MKELAEKKIPLVIRR  |
|                | 914         | 157        | 171      | SSDEKRELLKRYRLK  |                | 960         | 126        | 140      | AEKKIPLVIRRYLPD  |
|                | 915         | 161        | 175      | KRELLKRYRLKESQL  |                | 961         | 130        | 144      | IPLVIRRYLPDGSFE  |
|                | 916         | 165        | 179      | LKRYRLKESQLPRIQ  |                | 962         | 134        | 148      | IRRYLPDGSFEDWSV  |
|                | 917         | 169        | 183      | RLKESQLPRIQRADP  |                | 963         | 138        | 152      | LPDGSFEDWSVEELI  |
|                | 918         | 173        | 187      | SQLPRIQRADPVALY  | Rpb6/7         | 964         |            |          | SFEDWSVEELIVDLM  |
|                | 919         | 177        | 191      | RIQRADPVALYLGLK  |                | 965         |            |          | WSVEELIVDLMFFIK  |
|                | 920         | 181        | 195      | ADPVALYLGLKRGEV  |                | 966         |            |          | ELIVDLMFFIKDLSL  |
|                | 921         | 185        | 199      | ALYLGLKRGEVVKII  |                | 967         |            |          | DLMFFIKDLSLNITL  |
|                | 922         | 189        | 203      | GLKRGEVVKIIRKSE  | Rpb7           | 968         | 3          | 17       | FIKDLSLNITLHPSF  |
|                | 923         | 193        | 207      | GEVVKIIRKSETSGR  |                | 969         | 7          | 21       | LSLNITLHPSFFGPR  |
|                | 924         | 197        | 211      | KIIRKSETSGRYASY  |                | 970         | 11         | 25       | ITLHPSFFGPRMKQY  |
|                | 925         | 201        | 215      | KSETSGRYASYRICM  |                | 971         | 15         | 29       | PSFFGPRMKQYLKTK  |
| Rpb5/6         | 926         |            |          | SGRYASYRICMMSDY  |                | 972         | 19         | 33       | GPRMKQYLKTKLLEE  |
|                | 927         |            |          | ASYRICMMSDYEEAF  |                | 973         | 23         | 37       | KQYLKTKLLEEVEGS  |
|                | 928         |            |          | ICMMSDYEEAFNDGN  |                | 974         | 27         | 41       | KTKLLEEVEGSCCTGK |
| Rpb6           | 929         | 2          | 16       | SDYEEAFNDGNENFE  |                | 975         | 31         | 45       | LEEVEGSCCTGKFGYI |
|                | 930         | 6          | 20       | EAFNDGNENFEDFDV  |                | 976         | 35         | 49       | EGSCTGKFGYILCVL  |
|                | 931         | 10         | 24       | DGNENFEDFDVEHFS  |                | 977         | 39         | 53       | TGKFGYILCVLDYDN  |
|                | 932         | 14         | 28       | NFEDFDVEHFSDEET  |                | 978         | 43         | 57       | GYILCVLDYDNIDIQ  |
|                | 933         | 18         | 32       | FDVEHFSDEETYEEK  |                | 979         | 47         | 61       | CVLDYDNIDIQRGRI  |
|                | 934         | 22         | 36       | HFSDEETYEEKPQFK  |                | 980         | 51         | 65       | YDNIDIQRGRILPTD  |
|                | 935         | 26         | 40       | EETYEEKPQFKDGET  |                | 981         | 55         | 69       | DIQRGRILPTDGSAAE |
|                | 936         | 30         | 44       | EEKPQFKDGETTDAN  |                | 982         | 59         | 73       | GRILPTDGSAAEFNVK |
|                | 937         | 34         | 48       | QFKDGETTDANGKTI  |                | 983         | 63         | 77       | PTDGSAAEFNVKYRAV |
|                | 938         | 38         | 52       | GETTDANGKTIIVTGG |                | 984         | 67         | 81       | SAEFNVKYRAVVFVKP |
|                | 939         | 42         | 56       | DANGKTIIVTGGNGPE |                | 985         | 71         | 85       | NVKYRAVVFVKPFKGE |
|                | 940         | 46         | 60       | KTIIVTGGNGPEDFQQ |                | 986         | 75         | 89       | RAVVFVKPFKGEVVDG |
|                | 941         | 50         | 64       | TGGNGPEDFQQHEQI  |                | 987         | 79         | 93       | FKPFKGEVVDGTVVS  |
|                | 942         | 54         | 68       | GPEDFQQHEQIRRK   |                | 988         | 83         | 97       | KGEVVDGTVVSCSQH  |
|                | 943         | 58         | 72       | FQQHEQIRRKTLKEK  |                | 989         | 87         | 101      | VDGTVVSCSQHGFEV  |
|                | 944         | 62         | 76       | EQIRRKTLKEKAIPK  |                | 990         | 91         | 105      | VVSCSQHGFEVQVGP  |
|                | 945         | 66         | 80       | RKTLKEKAIPKDQRA  |                | 991         | 95         | 109      | SQHGFEVQVGPVKVF  |
|                | 946         | 70         | 84       | KEKAIPKDQRATTPY  |                | 992         | 99         | 113      | FEVQVGPVKVFTVKH  |
|                | 947         | 74         | 88       | IPKDQRATTPYMTKY  |                | 993         | 103        | 117      | VGPMKVFVTKHLMMPQ |
|                | 948         | 78         | 92       | QRATTPYMTKYERAR  |                | 994         | 107        | 121      | KVFVTKHLMMPQDLTF |
|                | 949         | 82         | 96       | TPYMTKYERARILGT  |                | 995         | 111        | 125      | TKHLMMPQDLTFNAGS |
|                | 950         | 86         | 100      | TKYERARILGTRALQ  |                | 996         | 115        | 129      | MPQDLTFNAGSNPPS  |
|                | 951         | 90         | 104      | RARILGTRALQISMN  |                | 997         | 119        | 133      | LTFNAGSNPPSYQSS  |
|                | 952         | 94         | 108      | LGTRALQISMNAPVF  |                | 998         | 123        | 137      | AGSNPPSYQSSQSEVI |
|                | 953         | 98         | 112      | ALQISMNAPVFDLE   |                | 999         | 127        | 141      | PPSYQSSQSEVITIKS |
|                | 954         | 102        | 116      | SMNAPVFDLEGETD   |                | 1000        | 131        | 145      | QSSQSEVITIKSRIRV |
|                | 955         | 106        | 120      | PVFDLEGETDPLRI   |                | 1001        | 135        | 149      | DVITIKSRIRVKIEG  |
|                | 956         | 110        | 124      | DLEGETDPLRIAMKE  |                | 1002        | 139        | 153      | IKSRIRVKIEGCISQ  |

| Pol II subunit | Peptide No. | Start a.a. | End a.a. | Sequence         | Pol II subunit | Peptide No. | Start a.a. | End a.a. | Sequence         |
|----------------|-------------|------------|----------|------------------|----------------|-------------|------------|----------|------------------|
|                | 1003        | 143        | 157      | IRVKIEGCISQVSSI  |                | 1049        | 10         | 24       | CNNMLYPREDKENNR  |
|                | 1004        | 147        | 161      | IEGCISQVSSIIHAIG |                | 1050        | 14         | 28       | LYPREDKENNRLLFE  |
|                | 1005        | 151        | 165      | ISQVSSIIHAIGSIKE |                | 1051        | 18         | 32       | EDKENNRLLFECRTC  |
|                | 1006        | 155        | 169      | SSIIHAIGSIKEDYLG |                | 1052        | 22         | 36       | NNRLLFECRTCZYVE  |
| Rpb7/8         | 1007        |            |          | AIGSIKEDYLGAIMS  |                | 1053        | 26         | 40       | LFECRTCZYVEEAGS  |
|                | 1008        |            |          | IKEDYLGAIMSNTLF  |                | 1054        | 30         | 44       | RTCSZYVEEAGSPLVY |
|                | 1009        |            |          | YLGAIMSNTLFDIF   |                | 1055        | 34         | 48       | YVEEAGSPLVYRHEL  |
|                | 1010        |            |          | IMSNTLFDIFQVSE   |                | 1056        | 38         | 52       | AGSPLVYRHELITNI  |
| Rpb8           | 1011        | 4          | 18       | TLFDIFQVSEVDPG   |                | 1057        | 42         | 56       | LVYRHELITNIGETA  |
|                | 1012        | 8          | 22       | DIFQVSEVDPGRYNK  |                | 1058        | 46         | 60       | HELITNIGETAGVVQ  |
|                | 1013        | 12         | 26       | VSEVDPGRYKVCRI   |                | 1059        | 50         | 64       | TNIGETAGVVQDIGS  |
|                | 1014        | 16         | 30       | DPGRYKVCRIEAAAS  |                | 1060        | 54         | 68       | ETAGVVQDIGSDPTL  |
|                | 1015        | 20         | 34       | YNKVCRIEAASTTQD  |                | 1061        | 58         | 72       | VVQDIGSDPTLPRSD  |
|                | 1016        | 24         | 38       | CRIEAASTTQDQCKL  |                | 1062        | 62         | 76       | IGSDPTLPRSDRECP  |
|                | 1017        | 28         | 42       | AASTTQDQCKLTLDI  |                | 1063        | 66         | 80       | PTLPRSDRECPKCHS  |
|                | 1018        | 32         | 46       | TQDQCKLTLDINVEL  |                | 1064        | 70         | 84       | RSDRECPKCHSRENV  |
|                | 1019        | 36         | 50       | CKLTLDINVELFPVA  |                | 1065        | 74         | 88       | ECPKCHSRENVFFQS  |
|                | 1020        | 40         | 54       | LDINVELFPVAAQDS  |                | 1066        | 78         | 92       | CHSRENVFFQSQR    |
|                | 1021        | 44         | 58       | VELFPVAAQDSLTVT  |                | 1067        | 82         | 96       | ENVFFQSQRKDT     |
|                | 1022        | 48         | 62       | PVAAQDSLTVTIASS  |                | 1068        | 86         | 100      | FQSQRKDTSMVLF    |
|                | 1023        | 52         | 66       | QDSLTVTIASSLNLE  |                | 1069        | 90         | 104      | QRRKDTSMVLFVCL   |
|                | 1024        | 56         | 70       | TVTIASSLNLEDTPA  |                | 1070        | 94         | 108      | DTSMVLFVCLSCSH   |
|                | 1025        | 60         | 74       | ASSLNLEDTPANDSS  |                | 1071        | 98         | 112      | VLVFVCLSCSHIFTS  |
|                | 1026        | 64         | 78       | NLEDTPANDSSATRS  |                | 1072        | 102        | 116      | VCLSCSHIFTSQDN   |
|                | 1027        | 68         | 82       | TPANDSSATRSWRPP  |                | 1073        | 106        | 120      | CSHIFTSQDNKRTQ   |
|                | 1028        | 72         | 86       | DSSATRSWRPPQAGD  | Rpb9/10        | 1074        |            |          | FTSDQKNKRTQFSMI  |
|                | 1029        | 76         | 90       | TRSWRPPQAGDRSLA  |                | 1075        |            |          | QKNKRTQFSMIVPVR  |
|                | 1030        | 80         | 94       | RPPQAGDRSLADDYD  |                | 1076        |            |          | RTQFSMIVPVRFCFSC |
|                | 1031        | 84         | 98       | AGDRSLADDYDYVMY  |                | 1077        |            |          | SMIVPVRFCFSGKVV  |
|                | 1032        | 88         | 102      | SLADDYDYVMYGTAY  | Rpb10          | 1078        | 4          | 18       | PVRCFSGKVVGDKNV  |
|                | 1033        | 92         | 106      | DYDYVMYGTAYKFEE  |                | 1079        | 8          | 22       | FSGKVVGDKWESYL   |
|                | 1034        | 96         | 110      | VMYGTAYKFEVSKD   |                | 1080        | 12         | 26       | KVVGDKWESYLNLLQ  |
|                | 1035        | 100        | 114      | TAYKFEVSKDLIAV   |                | 1081        | 16         | 30       | DKWESYLNLLQEDL   |
|                | 1036        | 104        | 118      | FEEVSKDLIAVYYSF  |                | 1082        | 20         | 34       | SYLNLLQEDLDEGT   |
|                | 1037        | 108        | 122      | SKDLIAVYYSFGGLL  |                | 1083        | 24         | 38       | LLQEDLDEGTALSR   |
|                | 1038        | 112        | 126      | IAVYYSFGGLLMRLE  |                | 1084        | 28         | 42       | DELDEGTALSRGLK   |
|                | 1039        | 116        | 130      | YSFGGLLMRLEGNYR  |                | 1085        | 32         | 46       | EGTALSRGLKRYCC   |
|                | 1040        | 120        | 134      | GLLMRLEGNYRNLN   |                | 1086        | 36         | 50       | LSRGLKRYCCRRMI   |
|                | 1041        | 124        | 138      | RLEGNYRNLNLLKQE  |                | 1087        | 40         | 54       | GLKRYCCRRMILTHV  |
|                | 1042        | 128        | 142      | NYRNLNLLKQENAYL  |                | 1088        | 44         | 58       | YCCRRMILTHVDLIE  |
|                | 1043        | 132        | 146      | LNNLLKQENAYLLIRR |                | 1089        | 48         | 62       | RMILTHVDLIEKFLR  |
| Rpb8/9         | 1044        |            |          | KQENAYLLIRRMNTTF |                | 1090        | 52         | 66       | THVDLIEKFLRYNPL  |
|                | 1045        |            |          | AYLLIRRMNTTFRFCR |                | 1091        | 56         | 70       | LIEKFLRYNPLEKRD  |
|                | 1046        |            |          | IRRMNTTFRFCRDCNN | Rpb10/11       | 1092        |            |          | FLRYNPLEKRD MNAP |
| Rpb9           | 1047        | 2          | 16       | TFRFCRDCNNMLYP   |                | 1093        |            |          | NPLEKRD MNAPDRFE |
|                | 1048        | 6          | 20       | FCRDCNNMLYPREDK  |                | 1094        |            |          | KRD MNAPDRFELFL  |



| Pol II subunit | Peptide No. | Start a.a. | End a.a.        | Sequence         |
|----------------|-------------|------------|-----------------|------------------|
| <b>Rpb11</b>   | 1095        | 2          | 16              | NAPDRFELFLLGEGE  |
|                | 1096        | 6          | 20              | RFELFLLGEGESKLK  |
|                | 1097        | 10         | 24              | FLLGEGESKLIKIDPD |
|                | 1098        | 14         | 28              | EGESKLIKIDPDTKAP |
|                | 1099        | 18         | 32              | CLKIDPDTKAPNAV   |
|                | 1100        | 22         | 36              | DPDTKAPNAVITFE   |
|                | 1101        | 26         | 40              | KAPNAVITFEKEDH   |
|                | 1102        | 30         | 44              | AVVITFEKEDHTLGN  |
|                | 1103        | 34         | 48              | TFEKEDHTLGNLIRA  |
|                | 1104        | 38         | 52              | EDHTLGNLIRAEELLN |
|                | 1105        | 42         | 56              | LGNLIRAEELLNDRKV |
|                | 1106        | 46         | 60              | IRAEELLNDRKVLFAA |
|                | 1107        | 50         | 64              | LLNDRKVLFAAYKVE  |
|                | 1108        | 54         | 68              | RKVLFAAYKVEHPFF  |
|                | 1109        | 58         | 72              | FAAYKVEHPFFARFK  |
|                | 1110        | 62         | 76              | KVEHPFFARFKLRIQ  |
|                | 1111        | 66         | 80              | PPFARFKLRIQTTEG  |
|                | 1112        | 70         | 84              | RFKLRIQTTEGYDPK  |
|                | 1113        | 74         | 88              | RIQTTEGYDPKDALK  |
|                | 1114        | 78         | 92              | TEGYDPKDALKNACN  |
|                | 1115        | 82         | 96              | DPKDALKNACNSIIN  |
| 1116           | 86          | 100        | ALKNACNSIINKLGA |                  |
| 1117           | 90          | 104        | ACNSIINKLGALKTN |                  |
| 1118           | 94          | 108        | IINKLGALKTNFETE |                  |
| 1119           | 98          | 112        | LGALKTNFETEWNLQ |                  |
| 1120           | 102         | 116        | KTNFETEWNLQTLAA |                  |
| 1121           | 106         | 120        | ETEWNLQTLAADDAF |                  |
| Rpb11/12       | 1122        |            |                 | NLQTLAADDAFMSRE  |
|                | 1123        |            |                 | LAADDAFMSREGFQI  |
|                | 1124        |            |                 | DAFMSREGFQIPTNL  |
| <b>Rpb12</b>   | 1125        | 2          | 16              | SREGFQIPTNLDAAA  |
|                | 1126        | 6          | 20              | FQIPTNLDAAAAGTS  |
|                | 1127        | 10         | 24              | TNLDAAAAGTSQART  |
|                | 1128        | 14         | 28              | AAAAGTSQARTATLK  |
|                | 1129        | 18         | 32              | GTSQARTATLKYICA  |
|                | 1130        | 22         | 36              | ARTATLKYICAECS   |
|                | 1131        | 26         | 40              | TLKYICAECSKLSL   |
|                | 1132        | 30         | 44              | ICAECSKLSLSRTD   |
|                | 1133        | 34         | 48              | CSSKLSLSRTDAVRC  |
|                | 1134        | 38         | 52              | LSLSRTDAVRCKDCG  |
|                | 1135        | 42         | 56              | RTDAVRCKDCGHRIL  |
|                | 1136        | 46         | 60              | VRCKDCGHRILLKAR  |
|                | 1137        | 50         | 64              | DCGHRILLKARTKRL  |
|                | 1138        | 54         | 68              | RILLKARTKRLVQFE  |
|                | 1139        | 56         | 70              | LLKARTKRLVQFEAR  |

**Supplemental Table S2** List of all 15meric Pol II-derived peptides, which interact with Npa3. 'Start a.a.' and 'End a.a.' depicts the first and last amino acid of the corresponding peptide in the respective Pol II subunit sequence.

| Pol II subunit | Peptide No | Start a.a. | End a.a. | Sequence        | Interface       |
|----------------|------------|------------|----------|-----------------|-----------------|
| Rpb1           | 3          | 9          | 23       | APLRTVKEVQFGLFS | Yes             |
|                | 20         | 77         | 91       | CPGHFGHIDLAKPVF | Yes             |
|                | 21         | 81         | 95       | FGHIDLAKPVFHVGF | Yes             |
|                | 24         | 93         | 107      | VGFIKIKKVCCEVC  | Yes             |
|                | 26         | 101        | 115      | KVCECVMHCGKLLL  | No              |
|                | 32         | 125        | 139      | ALAIKDSKKRFAAIW | No              |
|                | 57         | 225        | 239      | NEVFSRPEWMILTCL | Yes             |
|                | 85         | 337        | 351      | RGNLMGKRVDFSART | Yes             |
|                | 105        | 417        | 431      | YSKRAGDIQLQYGWK | Yes             |
|                | 106        | 421        | 435      | AGDIQLQYGWKVERH | Yes             |
|                | 115        | 457        | 471      | AHRVKVIPYSTFRLN | Yes             |
|                | 193        | 769        | 783      | SVEGKRIAFGFVDRT | Yes             |
|                | 194        | 773        | 787      | KRIAFGFVDRTLPHF | Yes             |
|                | 201        | 801        | 815      | ENSYLRGLTPQEFFE | Yes             |
|                | 234        | 933        | 947      | YKQLVKDRKFLREVF | Yes             |
|                | 261        | 1041       | 1055     | AFDWVLSNIEAQFLR | Yes             |
|                | 275        | 1097       | 1111     | GVPRLKEILNVAKNM | No              |
|                | 305        | 1217       | 1231     | KQTFKNDLFIWSED  | No              |
|                | 375        | 1497       | 1511     | DSGSNDAMAGGFTAY | Lacking in 1WCM |
|                | Rpb2       | 463        | 116      | 130             | EARLRNLTYSGLFV  |
| 464            |            | 120        | 134      | RNLTYSGLFVDVKK  | No              |
| 465            |            | 124        | 138      | YSSGLFVDVKKRTYE | No              |
| 481            |            | 188        | 202      | DLYLKECPFDMGGY  | Yes             |
| 482            |            | 192        | 206      | LKECFDMGGYFIIN  | Yes             |
| 525            |            | 364        | 378      | ITQLEGFESRKAFFL | No              |
| 527            |            | 372        | 386      | SRKAFFLGMINRLL  | No              |
| 539            |            | 420        | 434      | LFKKLTKDIFRYMQR | No              |
| 547            |            | 452        | 466      | TITSGLYALATGNW  | No              |
| 630            |            | 784        | 798      | NYNVRMDTMANILYY | Yes             |
| 645            |            | 844        | 858      | SSIDRGLFRSLFFRS | Yes             |
| 646            |            | 848        | 862      | RGLFRSLFFRSYMDQ | Yes             |
| 647            |            | 852        | 866      | RSLFFRSYMDQEKKY | Yes             |
| 730            |            | 1184       | 1198     | GCDNKIDIYQIHIPY | Yes             |
| Rpb4           | 833        | 54         | 68       | EARLVIKEALVERRR | Yes             |
|                | 834        | 58         | 72       | VIKEALVERRRAFKR | Yes             |
|                | 837        | 70         | 84       | FKRSQKKHKKHKLKH | Yes             |
|                | 855        | 142        | 156      | KNTMQYLTFNSRFRD | Yes             |
| Rpb5           | 892        | 69         | 83       | ISKFPDMGSLWVEFC | No              |
|                | 921        | 185        | 199      | ALYLGLKRGEVVKII | No              |
| Rpb7           | 970        | 11         | 25       | ITLHPSFFGPRMKQY | Yes             |
|                | 971        | 15         | 29       | PSFFGPRMKQYLKTK | Yes             |
|                | 975        | 31         | 45       | LEEVEGSCTGKFGYI | Yes             |
|                | 976        | 35         | 49       | EGSCTGKFGYILCVL | Yes             |
|                | 977        | 39         | 53       | TGKFGYILCVLDYDN | Yes             |
| Rpb8           | 984        | 67         | 81       | SAEFNVKYRAVFKP  | Yes             |
|                | 1036       | 104        | 118      | FEEVSKDLIAVYYSF | Yes             |
|                | 1037       | 108        | 122      | SKDLIAVYYSFGGLL | Yes             |
|                | 1038       | 112        | 126      | IAVYYSFGGLLMRLE | Yes             |
|                | 1039       | 116        | 130      | YSFGGLLMRLEGNYR | Yes             |
|                | 1043       | 132        | 146      | LNNLKQENAYLLIRR | Yes             |
| Rpb9           | 1047       | 2          | 16       | TTFRCRDCNNMLYP  | Yes             |
| Rpb11          | 1106       | 46         | 60       | IRAELLNDRKVLFAA | Yes             |
|                | 1108       | 54         | 68       | RKVLFAAYKVEHPFF | Yes             |
|                | 1109       | 58         | 72       | FAAYKVEHPFFARFK | Yes             |
|                | 1110       | 62         | 76       | KVEHPFFARFKLRIQ | Yes             |



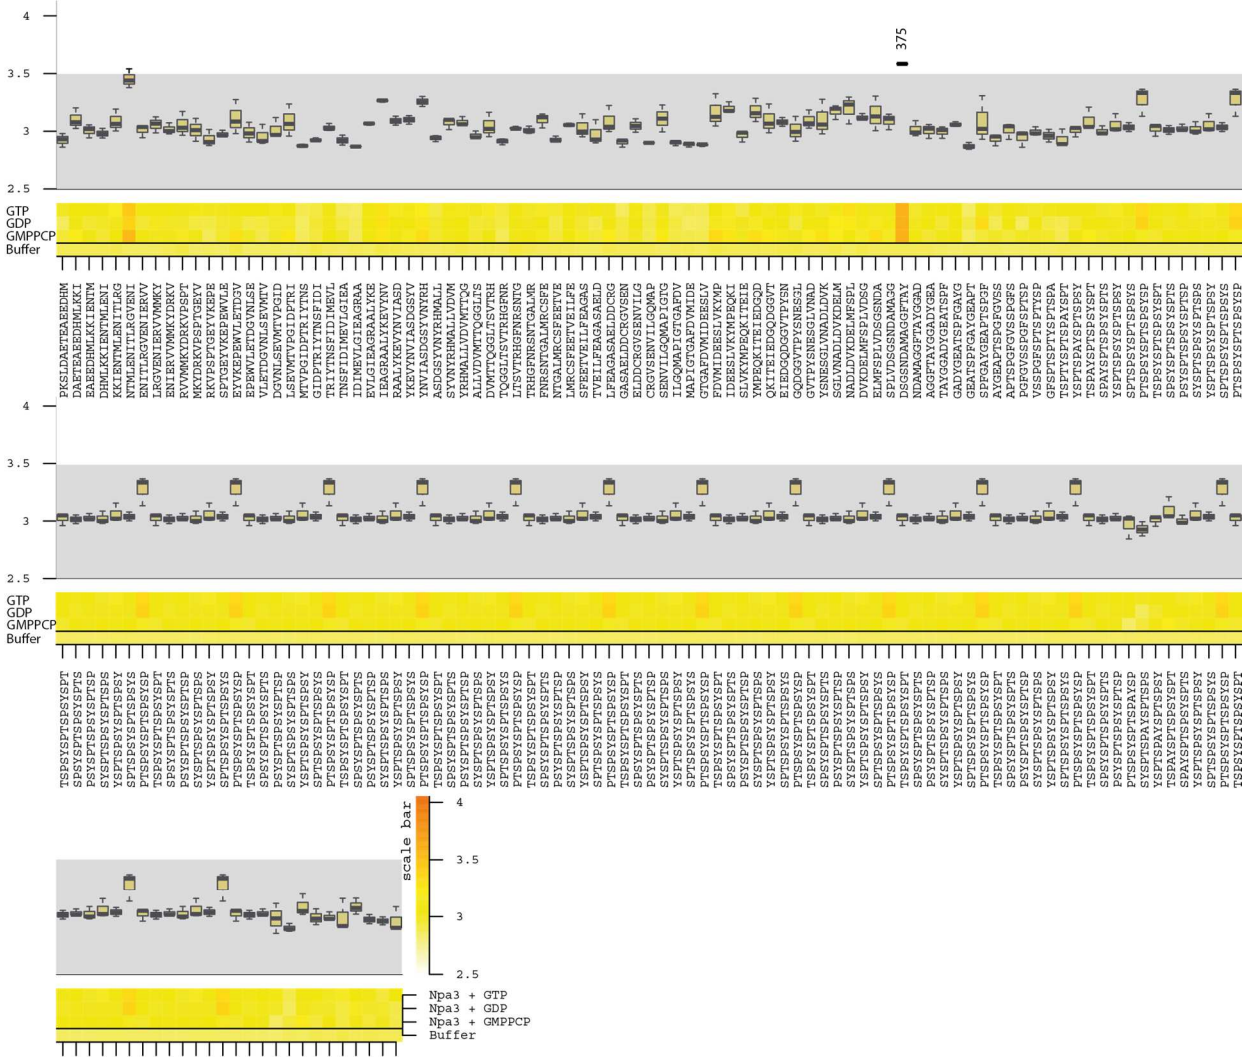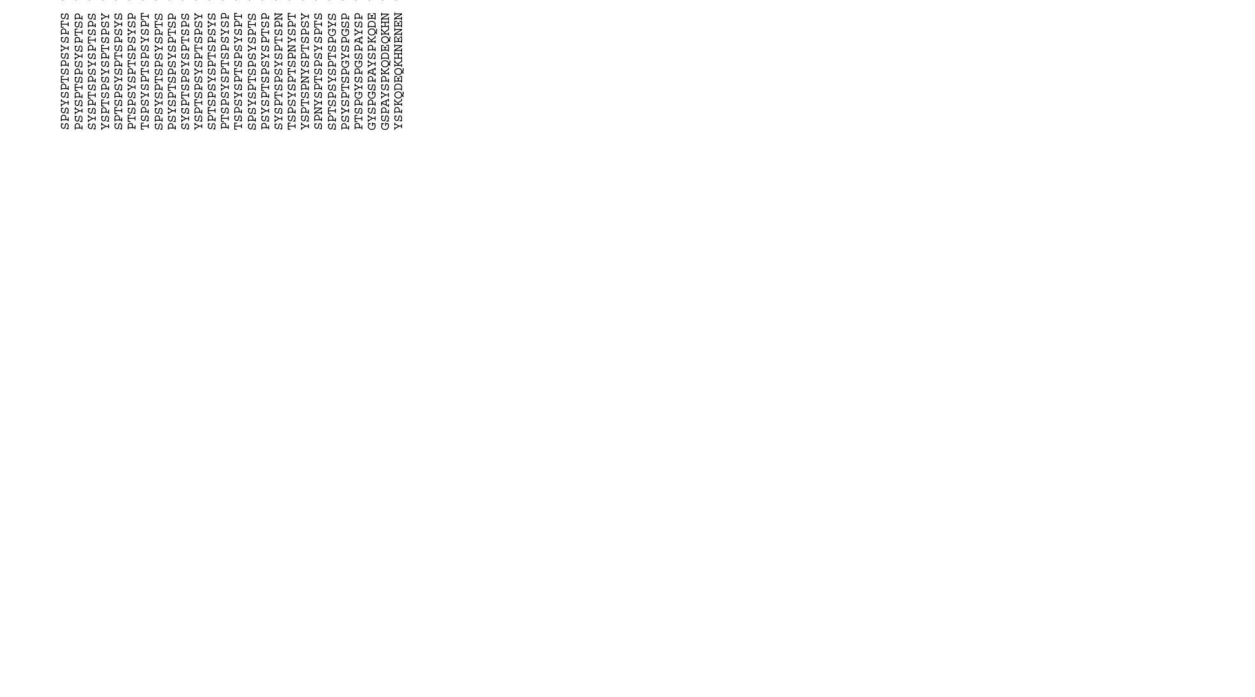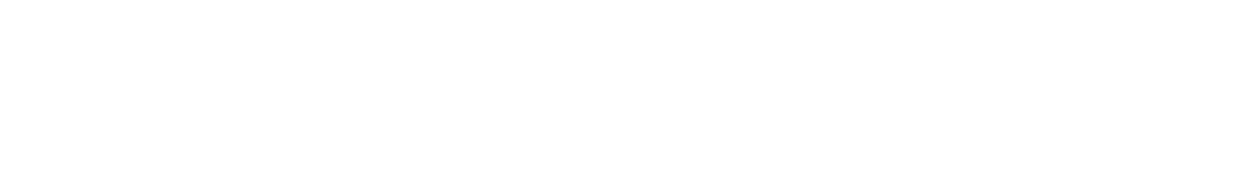



B

Rpb2-derived peptides

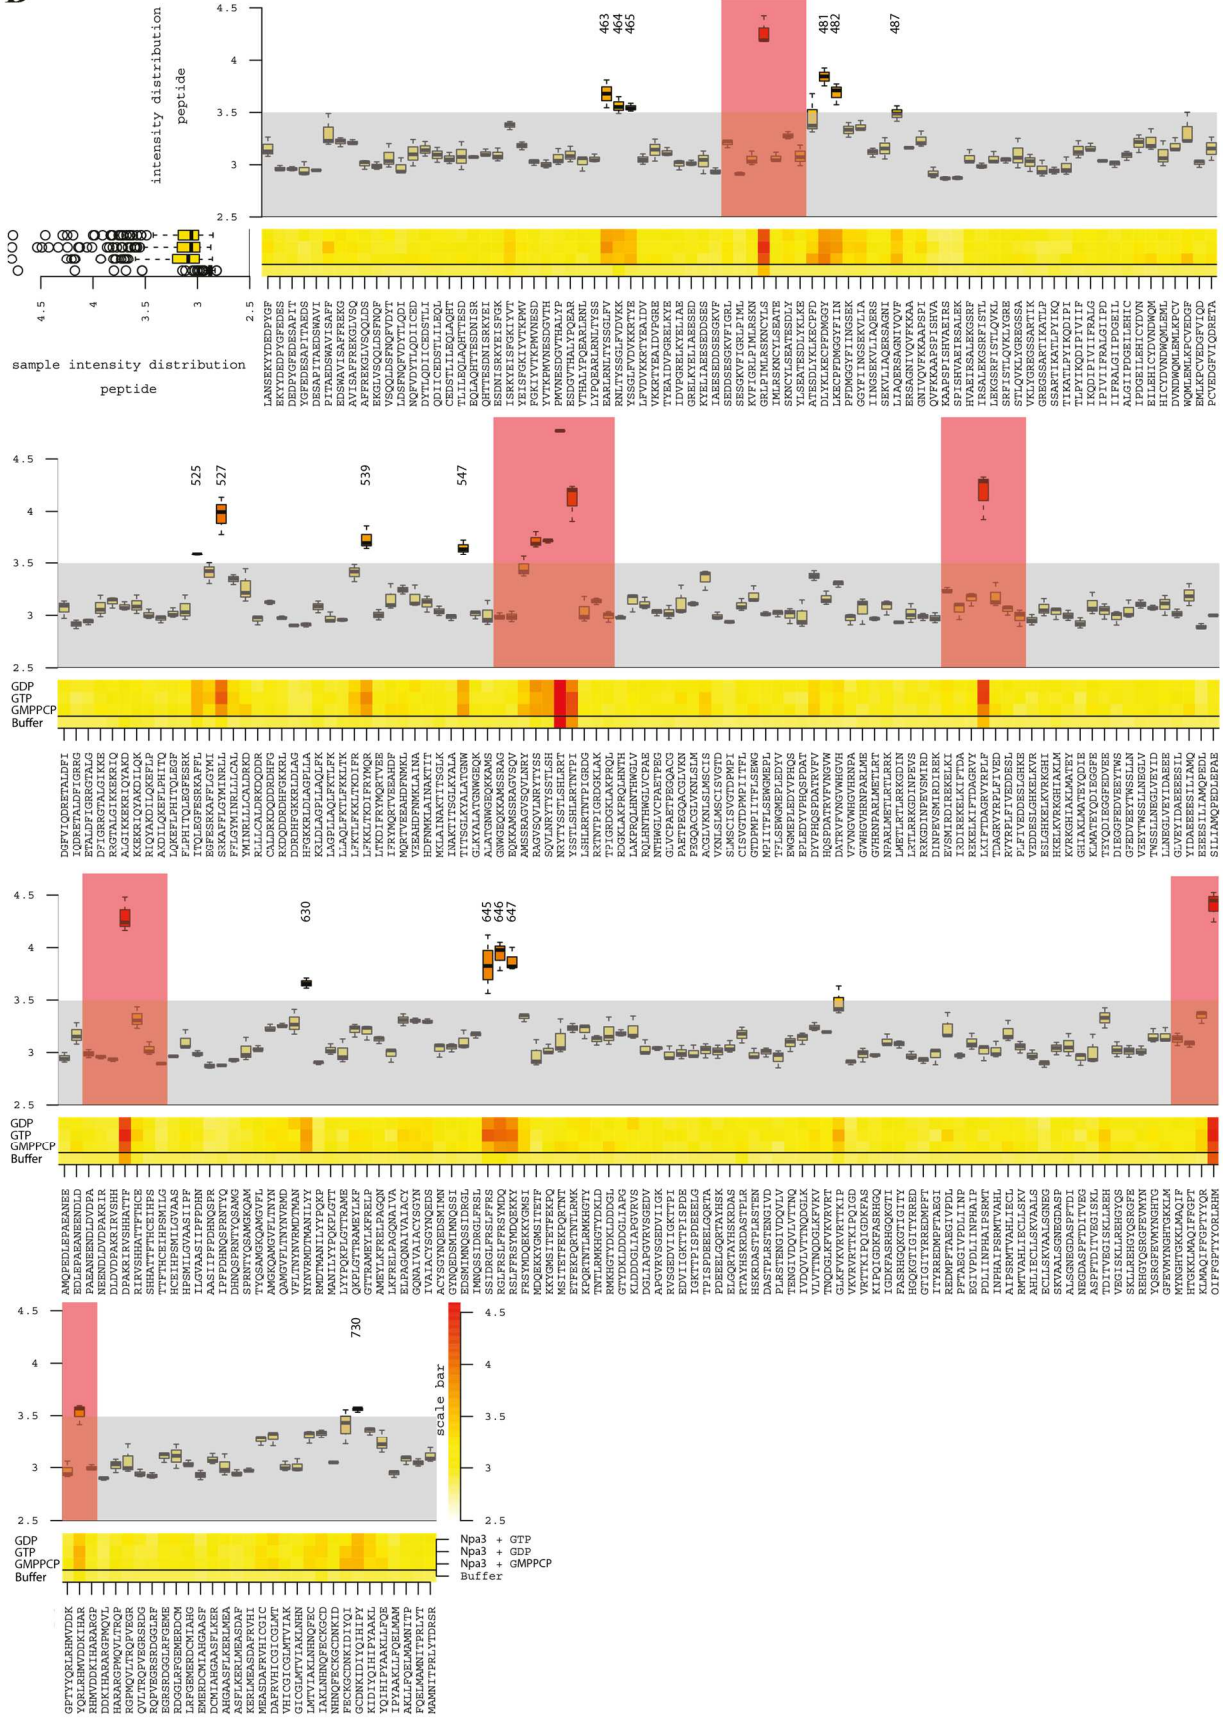

**C**

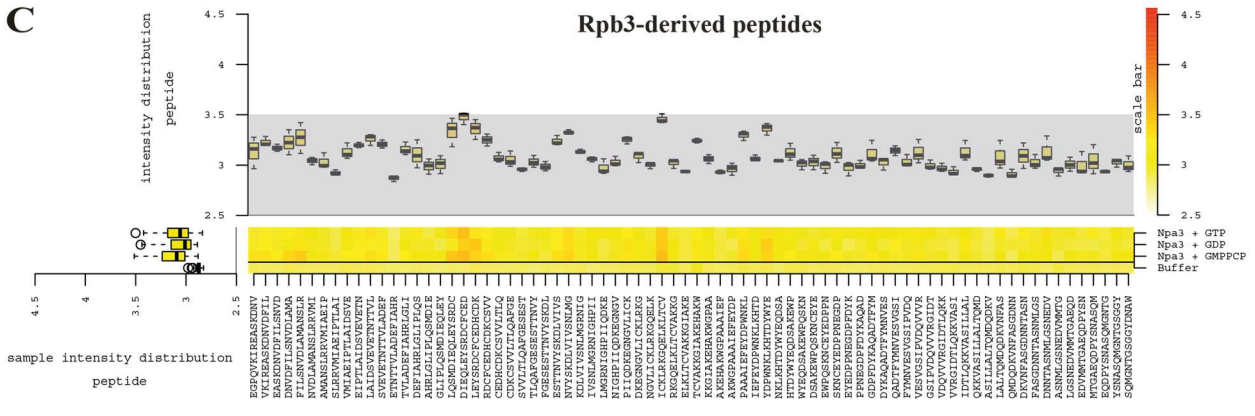

**D**

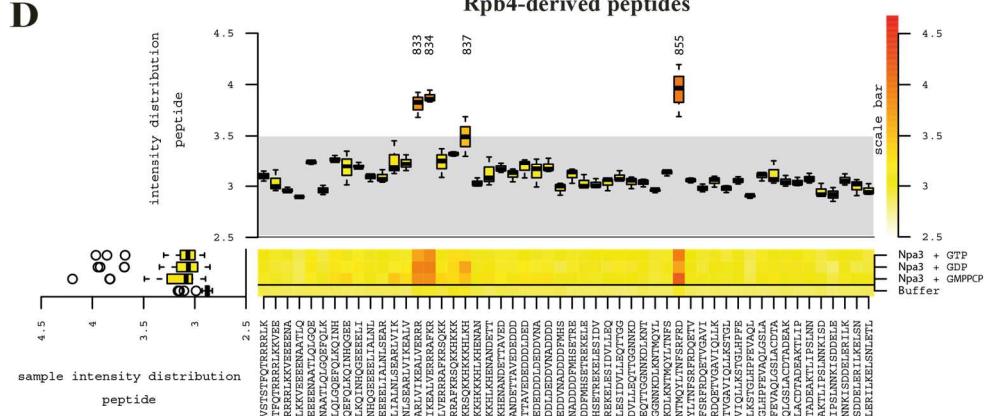

**E**

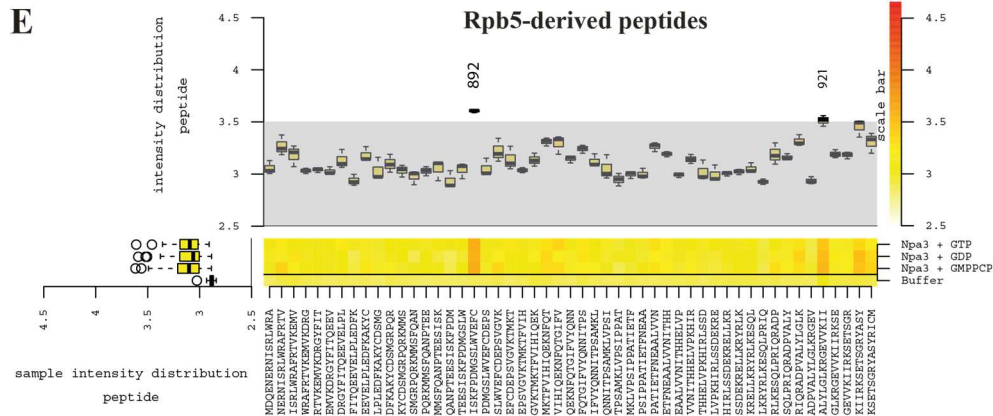

**F**

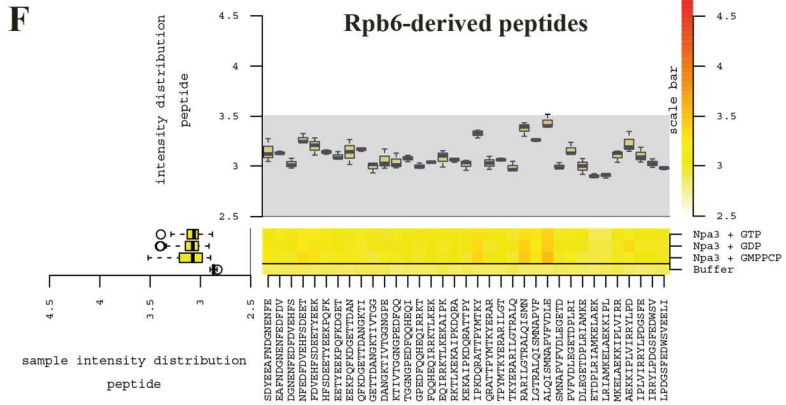

**G**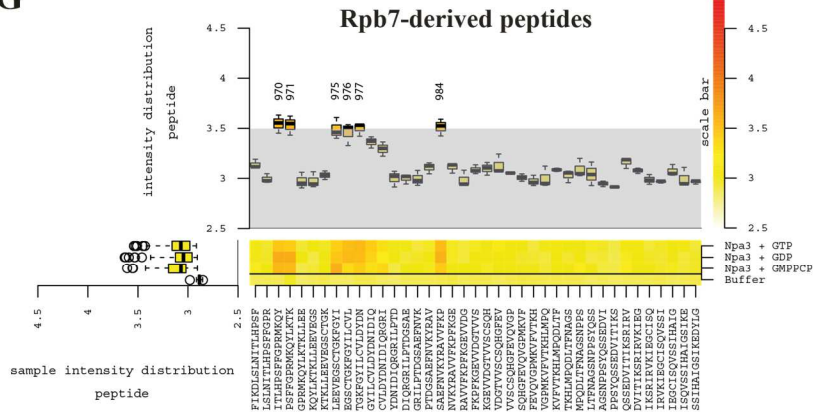**H**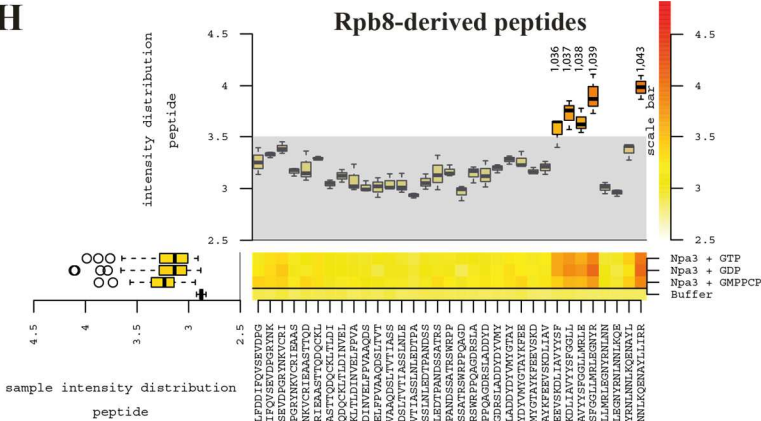**I**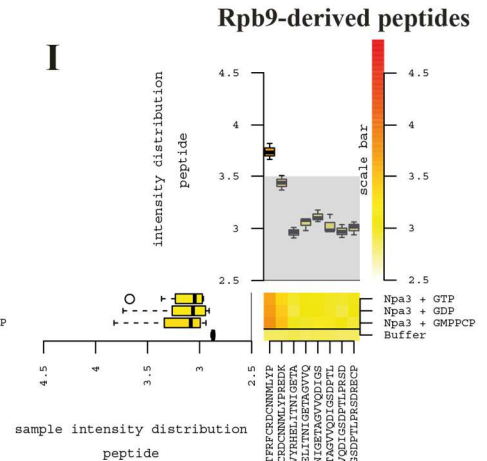**J**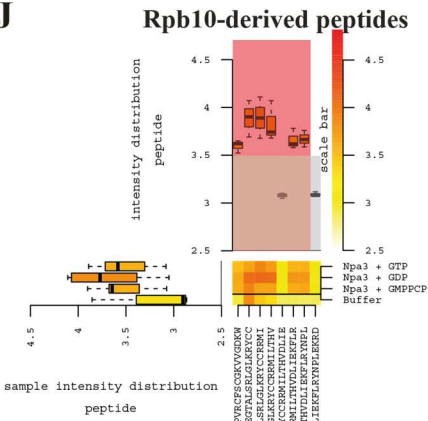**K**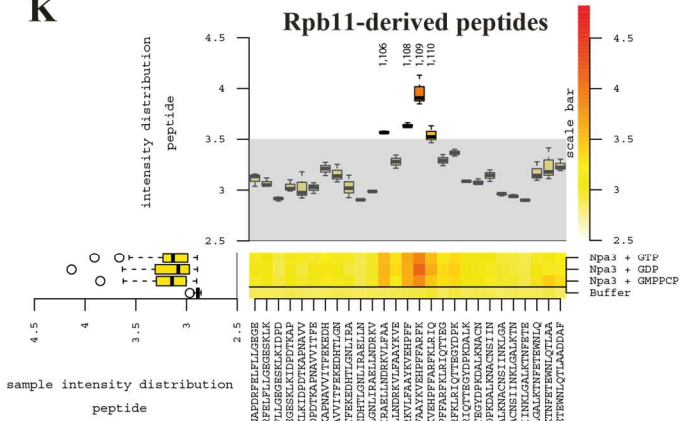**L**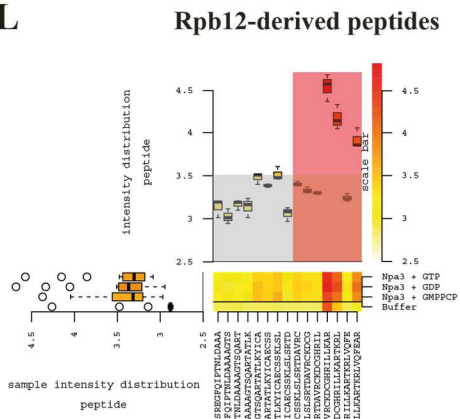

**Supplemental Figure S4** Heatmap and boxplot representation of Npa3 binding to 1,139 Pol II-derived peptides in the presence of GTP, GDP and GMPPCP, respectively. Results are shown individually for all 12 Pol II subunits Rpb1-Rpb12 (Supplemental Figures. S4 A-L, respectively). Control experiments were performed without Npa3 and nucleotides to test cross-reactivity of the anti-His antibody (Buffer). Red boxes indicate false-positive binding of the antibody to the peptides, either directly or in overlapping regions. These peptides were not used for further analysis. Intensity distributions are shown in logarithmic scale. Upper panels: Boxplot for each peptide showing the signal distribution of all samples. Left panels: Boxplot for each sample showing the signal distribution of all peptides from the corresponding Pol II subunit. Peptides with signal intensity  $<3.5$  were defined as unbound (grey area). Peptide numbers are shown for Npa3 binding peptides above the boxplots (see Supplemental Tables S1 and S2).
